# Supplementary material for: Identification of key miRNAs affecting broilers with valgus–varus deformity by RNA sequencing and analysis of miRNA–mRNA interactions
Source: Royal Society of Chemistry journal article supplement (doi:10.1039/d1mo00011j), 2021-06-07
Supplement: d1mo00011j2.xlsx [file d1mo00011j2.xlsx]

## Sheet: Sheet1
GO_accession	Description	Term_type	Over_represented_pValue	Corrected_pValue	DEG_item	DEG_list	Bg_item	Bg_list	Gene_names
GO:0005737	cytoplasm	cellular_component	2.142e-06	0.039185	387	778	6231	15235	ENSGALG00000035079,ENSGALG00000006968,ENSGALG00000015399,ENSGALG00000014194,ENSGALG00000029530,ENSGALG00000027281,ENSGALG00000029118,ENSGALG00000000164,ENSGALG00000003948,ENSGALG00000031099,ENSGALG00000028749,ENSGALG00000028543,ENSGALG00000002053,ENSGALG00000033149,ENSGALG00000011178,ENSGALG00000010283,ENSGALG00000008051,ENSGALG00000043336,ENSGALG00000002849,ENSGALG00000007767,ENSGALG00000011650,…
GO:0044444	cytoplasmic part	cellular_component	1.2383e-05	0.079608	313	778	4933	15235	ENSGALG00000036452,ENSGALG00000007492,ENSGALG00000007531,ENSGALG00000001823,ENSGALG00000039432,ENSGALG00000008073,ENSGALG00000032915,ENSGALG00000033885,ENSGALG00000007130,ENSGALG00000024083,ENSGALG00000039783,ENSGALG00000000811,ENSGALG00000007437,ENSGALG00000002558,ENSGALG00000027611,ENSGALG00000026159,ENSGALG00000040247,ENSGALG00000040397,ENSGALG00000037401,ENSGALG00000004193,ENSGALG00000002453,…
GO:0043228	non-membrane-bounded organelle	cellular_component	1.7406e-05	0.079608	185	778	2734	15235	ENSGALG00000001375,ENSGALG00000013882,ENSGALG00000008127,ENSGALG00000040397,ENSGALG00000035267,ENSGALG00000039170,ENSGALG00000000585,ENSGALG00000036963,ENSGALG00000027611,ENSGALG00000026159,ENSGALG00000000891,ENSGALG00000008796,ENSGALG00000000811,ENSGALG00000024083,ENSGALG00000039783,ENSGALG00000033885,ENSGALG00000007130,ENSGALG00000008073,ENSGALG00000000542,ENSGALG00000009031,ENSGALG00000001503,…
GO:0043232	intracellular non-membrane-bounded organelle	cellular_component	1.7406e-05	0.079608	185	778	2734	15235	ENSGALG00000040397,ENSGALG00000035267,ENSGALG00000039170,ENSGALG00000000585,ENSGALG00000036963,ENSGALG00000027611,ENSGALG00000026159,ENSGALG00000000891,ENSGALG00000001375,ENSGALG00000008127,ENSGALG00000013882,ENSGALG00000039783,ENSGALG00000024083,ENSGALG00000033885,ENSGALG00000007130,ENSGALG00000000542,ENSGALG00000008073,ENSGALG00000001503,ENSGALG00000009031,ENSGALG00000038299,ENSGALG00000012799,…
GO:0034660	ncRNA metabolic process	biological_process	4.5169e-05	0.16527	34	778	314	15235	ENSGALG00000032993,ENSGALG00000003086,ENSGALG00000035079,ENSGALG00000029118,ENSGALG00000024398,ENSGALG00000032400,ENSGALG00000000908,ENSGALG00000004817,ENSGALG00000002426,ENSGALG00000009598,ENSGALG00000010324,ENSGALG00000032329,ENSGALG00000028958,ENSGALG00000035080,ENSGALG00000001714,ENSGALG00000007767,ENSGALG00000029980,ENSGALG00000007967,ENSGALG00000003261,ENSGALG00000008796,ENSGALG00000006122,…
GO:0042254	ribosome biogenesis	biological_process	7.5065e-05	0.22106	23	778	185	15235	ENSGALG00000000542,ENSGALG00000003086,ENSGALG00000032993,ENSGALG00000003355,ENSGALG00000035079,ENSGALG00000004817,ENSGALG00000010401,ENSGALG00000002426,ENSGALG00000024398,ENSGALG00000008796,ENSGALG00000033993,ENSGALG00000014573,ENSGALG00000032400,ENSGALG00000028958,ENSGALG00000010324,ENSGALG00000036963,ENSGALG00000001542,ENSGALG00000000891,ENSGALG00000032329,ENSGALG00000007767,ENSGALG00000035677,…
GO:0016857	racemase and epimerase activity, acting on carbohydrates and derivatives	molecular_function	8.4586e-05	0.22106	4	778	6	15235	ENSGALG00000013828,ENSGALG00000031525,ENSGALG00000004047,ENSGALG00000002847
GO:0044710	single-organism metabolic process	biological_process	0.00011037	0.2524	221	778	3401	15235	ENSGALG00000020876,ENSGALG00000038338,ENSGALG00000011394,ENSGALG00000040573,ENSGALG00000006842,ENSGALG00000042333,ENSGALG00000041102,ENSGALG00000032173,ENSGALG00000043828,ENSGALG00000016241,ENSGALG00000006207,ENSGALG00000002847,ENSGALG00000000607,ENSGALG00000004948,ENSGALG00000036642,ENSGALG00000032763,ENSGALG00000013189,ENSGALG00000037171,ENSGALG00000007520,ENSGALG00000031525,ENSGALG00000030376,…
GO:0006399	tRNA metabolic process	biological_process	0.00015773	0.3098	18	778	131	15235	ENSGALG00000003851,ENSGALG00000008394,ENSGALG00000035080,ENSGALG00000011904,ENSGALG00000006486,ENSGALG00000001036,ENSGALG00000001714,ENSGALG00000003563,ENSGALG00000007967,ENSGALG00000029980,ENSGALG00000029118,ENSGALG00000024326,ENSGALG00000014573,ENSGALG00000006122,ENSGALG00000009598,ENSGALG00000003288,ENSGALG00000002426,ENSGALG00000000908
GO:0034470	ncRNA processing	biological_process	0.00017445	0.3098	26	778	231	15235	ENSGALG00000000908,ENSGALG00000004817,ENSGALG00000002426,ENSGALG00000008796,ENSGALG00000024398,ENSGALG00000014573,ENSGALG00000032400,ENSGALG00000024326,ENSGALG00000029118,ENSGALG00000003086,ENSGALG00000032993,ENSGALG00000035079,ENSGALG00000035677,ENSGALG00000005489,ENSGALG00000007767,ENSGALG00000037807,ENSGALG00000001714,ENSGALG00000028958,ENSGALG00000006486,ENSGALG00000001036,ENSGALG00000011904,…
GO:0006364	rRNA processing	biological_process	0.00018628	0.3098	17	778	123	15235	ENSGALG00000005489,ENSGALG00000035677,ENSGALG00000007767,ENSGALG00000037807,ENSGALG00000010324,ENSGALG00000032329,ENSGALG00000000891,ENSGALG00000028958,ENSGALG00000008796,ENSGALG00000024398,ENSGALG00000014573,ENSGALG00000032400,ENSGALG00000004817,ENSGALG00000002426,ENSGALG00000003086,ENSGALG00000032993,ENSGALG00000035079
GO:1901564	organonitrogen compound metabolic process	biological_process	0.00021546	0.31693	94	778	1267	15235	ENSGALG00000003948,ENSGALG00000010301,ENSGALG00000009725,ENSGALG00000008620,ENSGALG00000033185,ENSGALG00000024398,ENSGALG00000036257,ENSGALG00000008341,ENSGALG00000013878,ENSGALG00000003701,ENSGALG00000006968,ENSGALG00000035079,ENSGALG00000007702,ENSGALG00000004831,ENSGALG00000041418,ENSGALG00000029768,ENSGALG00000002519,ENSGALG00000011178,ENSGALG00000010324,ENSGALG00000034655,ENSGALG00000027501,…
GO:0044424	intracellular part	cellular_component	0.00025536	0.31693	507	778	8896	15235	ENSGALG00000001238,ENSGALG00000009581,ENSGALG00000024051,ENSGALG00000007027,ENSGALG00000026734,ENSGALG00000013759,ENSGALG00000032039,ENSGALG00000003199,ENSGALG00000041401,ENSGALG00000001883,ENSGALG00000016991,ENSGALG00000010296,ENSGALG00000003086,ENSGALG00000019114,ENSGALG00000012220,ENSGALG00000001551,ENSGALG00000031553,ENSGALG00000040380,ENSGALG00000035530,ENSGALG00000009421,ENSGALG00000001714,…
GO:0016072	rRNA metabolic process	biological_process	0.00027928	0.31693	17	778	127	15235	ENSGALG00000007767,ENSGALG00000005489,ENSGALG00000035677,ENSGALG00000037807,ENSGALG00000028958,ENSGALG00000010324,ENSGALG00000000891,ENSGALG00000032329,ENSGALG00000004817,ENSGALG00000002426,ENSGALG00000024398,ENSGALG00000008796,ENSGALG00000032400,ENSGALG00000014573,ENSGALG00000003086,ENSGALG00000032993,ENSGALG00000035079
GO:0032991	macromolecular complex	cellular_component	0.00029475	0.31693	243	778	3921	15235	ENSGALG00000000164,ENSGALG00000002919,ENSGALG00000010301,ENSGALG00000011017,ENSGALG00000010526,ENSGALG00000037160,ENSGALG00000040606,ENSGALG00000029530,ENSGALG00000014194,ENSGALG00000011388,ENSGALG00000040622,ENSGALG00000013878,ENSGALG00000040048,ENSGALG00000035079,ENSGALG00000031512,ENSGALG00000006968,ENSGALG00000007767,ENSGALG00000004583,ENSGALG00000010459,ENSGALG00000004831,ENSGALG00000037744,…
GO:0003824	catalytic activity	molecular_function	0.00029573	0.31693	286	778	4624	15235	ENSGALG00000042984,ENSGALG00000038948,ENSGALG00000033171,ENSGALG00000014054,ENSGALG00000007300,ENSGALG00000036417,ENSGALG00000005066,ENSGALG00000008066,ENSGALG00000040267,ENSGALG00000037807,ENSGALG00000026070,ENSGALG00000033266,ENSGALG00000041763,ENSGALG00000038801,ENSGALG00000025772,ENSGALG00000030410,ENSGALG00000040917,ENSGALG00000017079,ENSGALG00000005769,ENSGALG00000033888,ENSGALG00000023437,…
GO:0000469	cleavage involved in rRNA processing	biological_process	0.00031667	0.31693	5	778	13	15235	ENSGALG00000028958,ENSGALG00000002426,ENSGALG00000010324,ENSGALG00000032400,ENSGALG00000035079
GO:0046365	monosaccharide catabolic process	biological_process	0.0003231	0.31693	5	778	13	15235	ENSGALG00000033271,ENSGALG00000013828,ENSGALG00000001201,ENSGALG00000002847,ENSGALG00000004047
GO:0006783	heme biosynthetic process	biological_process	0.00032916	0.31693	5	778	13	15235	ENSGALG00000001375,ENSGALG00000003948,ENSGALG00000015240,ENSGALG00000035462,ENSGALG00000006968
GO:0044422	organelle part	cellular_component	0.0003481	0.3184	310	778	5141	15235	ENSGALG00000011570,ENSGALG00000026822,ENSGALG00000010324,ENSGALG00000011419,ENSGALG00000000284,ENSGALG00000002288,ENSGALG00000014836,ENSGALG00000007247,ENSGALG00000039384,ENSGALG00000001632,ENSGALG00000032843,ENSGALG00000003701,ENSGALG00000032986,ENSGALG00000011659,ENSGALG00000008620,ENSGALG00000007101,ENSGALG00000002836,ENSGALG00000030002,ENSGALG00000040904,ENSGALG00000001459,ENSGALG00000036638,…
GO:0044446	intracellular organelle part	cellular_component	0.00046244	0.40285	302	778	5014	15235	ENSGALG00000007247,ENSGALG00000039384,ENSGALG00000014836,ENSGALG00000032843,ENSGALG00000001632,ENSGALG00000011419,ENSGALG00000010324,ENSGALG00000026822,ENSGALG00000011570,ENSGALG00000002288,ENSGALG00000000284,ENSGALG00000030002,ENSGALG00000002836,ENSGALG00000007101,ENSGALG00000011659,ENSGALG00000008620,ENSGALG00000001459,ENSGALG00000040904,ENSGALG00000003701,ENSGALG00000032986,ENSGALG00000009073,…
GO:0007005	mitochondrion organization	biological_process	0.00054204	0.45073	32	778	334	15235	ENSGALG00000014194,ENSGALG00000002345,ENSGALG00000010296,ENSGALG00000039606,ENSGALG00000041401,ENSGALG00000013759,ENSGALG00000033185,ENSGALG00000002519,ENSGALG00000017627,ENSGALG00000002490,ENSGALG00000002288,ENSGALG00000027688,ENSGALG00000038400,ENSGALG00000026822,ENSGALG00000015773,ENSGALG00000000998,ENSGALG00000007492,ENSGALG00000014723,ENSGALG00000036659,ENSGALG00000016345,ENSGALG00000024326,…
GO:0006779	porphyrin-containing compound biosynthetic process	biological_process	0.0006522	0.51876	5	778	15	15235	ENSGALG00000001375,ENSGALG00000003948,ENSGALG00000015240,ENSGALG00000035462,ENSGALG00000006968
GO:0016491	oxidoreductase activity	molecular_function	0.00071672	0.54632	48	778	573	15235	ENSGALG00000027688,ENSGALG00000002053,ENSGALG00000034655,ENSGALG00000016027,ENSGALG00000005704,ENSGALG00000041418,ENSGALG00000011450,ENSGALG00000008040,ENSGALG00000040573,ENSGALG00000011394,ENSGALG00000038338,ENSGALG00000002849,ENSGALG00000027483,ENSGALG00000020876,ENSGALG00000040068,ENSGALG00000037148,ENSGALG00000004436,ENSGALG00000013878,ENSGALG00000041401,ENSGALG00000002925,ENSGALG00000030376,…
GO:0043226	organelle	cellular_component	0.00075196	0.55025	445	778	7767	15235	ENSGALG00000032993,ENSGALG00000002453,ENSGALG00000010276,ENSGALG00000042148,ENSGALG00000025904,ENSGALG00000013743,ENSGALG00000008746,ENSGALG00000030941,ENSGALG00000016855,ENSGALG00000029401,ENSGALG00000027665,ENSGALG00000042077,ENSGALG00000032763,ENSGALG00000004948,ENSGALG00000036642,ENSGALG00000015200,ENSGALG00000013916,ENSGALG00000043828,ENSGALG00000006207,ENSGALG00000007477,ENSGALG00000002124,…
GO:0043229	intracellular organelle	cellular_component	0.00081685	0.57219	438	778	7639	15235	ENSGALG00000039982,ENSGALG00000040157,ENSGALG00000041102,ENSGALG00000042333,ENSGALG00000026945,ENSGALG00000032329,ENSGALG00000012587,ENSGALG00000031475,ENSGALG00000032173,ENSGALG00000006161,ENSGALG00000002490,ENSGALG00000001617,ENSGALG00000010878,ENSGALG00000001381,ENSGALG00000007651,ENSGALG00000000302,ENSGALG00000013189,ENSGALG00000029369,ENSGALG00000007470,ENSGALG00000037171,ENSGALG00000007520,…
GO:0005730	nucleolus	cellular_component	0.00084449	0.57219	48	778	575	15235	ENSGALG00000001731,ENSGALG00000037807,ENSGALG00000001375,ENSGALG00000032730,ENSGALG00000005489,ENSGALG00000000891,ENSGALG00000036963,ENSGALG00000004505,ENSGALG00000006486,ENSGALG00000014573,ENSGALG00000008796,ENSGALG00000001144,ENSGALG00000036452,ENSGALG00000003130,ENSGALG00000014485,ENSGALG00000012799,ENSGALG00000003355,ENSGALG00000004738,ENSGALG00000000542,ENSGALG00000008073,ENSGALG00000008684,…
GO:0001522	pseudouridine synthesis	biological_process	0.00096624	0.6313	5	778	16	15235	ENSGALG00000010324,ENSGALG00000001714,ENSGALG00000030410,ENSGALG00000024326,ENSGALG00000008132
GO:1901566	organonitrogen compound biosynthetic process	biological_process	0.0011291	0.70285	61	778	794	15235	ENSGALG00000039432,ENSGALG00000039783,ENSGALG00000027700,ENSGALG00000008684,ENSGALG00000026055,ENSGALG00000038801,ENSGALG00000025772,ENSGALG00000004738,ENSGALG00000035462,ENSGALG00000000726,ENSGALG00000003288,ENSGALG00000016894,ENSGALG00000024326,ENSGALG00000006040,ENSGALG00000017097,ENSGALG00000006122,ENSGALG00000032145,ENSGALG00000006486,ENSGALG00000007300,ENSGALG00000001542,ENSGALG00000039734,…
GO:0016746	transferase activity, transferring acyl groups	molecular_function	0.0011526	0.70285	20	778	179	15235	ENSGALG00000033171,ENSGALG00000035748,ENSGALG00000002124,ENSGALG00000012587,ENSGALG00000039734,ENSGALG00000016555,ENSGALG00000032173,ENSGALG00000016875,ENSGALG00000012312,ENSGALG00000006688,ENSGALG00000004367,ENSGALG00000030466,ENSGALG00000025772,ENSGALG00000007362,ENSGALG00000027874,ENSGALG00000003948,ENSGALG00000014573,ENSGALG00000013189,ENSGALG00000011659,ENSGALG00000033185
