# Supplementary material for: Identification of key miRNAs affecting broilers with valgus–varus deformity by RNA sequencing and analysis of miRNA–mRNA interactions
Source: Royal Society of Chemistry journal article supplement (doi:10.1039/d1mo00011j), 2021-06-07
Supplement: d1mo00011j3.xlsx [file d1mo00011j3.xlsx]

## Sheet: Enriched KEGG pathway top 20
pathway_term	rich_factor	qvalue	gene_number
2-Oxocarboxylic acid metabolism	0.461538	0.0760315	6
Metabolic pathways	0.0972355	0.0760315	102
Valine, leucine and isoleucine degradation	0.243902	0.0760315	10
Biosynthesis of amino acids	0.186441	0.208585	11
Porphyrin and chlorophyll metabolism	0.24	0.320446	6
Cardiac muscle contraction	0.166667	0.320446	10
Glycosphingolipid biosynthesis - globo series	0.333333	0.320446	4
Glycosaminoglycan biosynthesis - chondroitin sulfate / dermatan sulfate	0.263158	0.320446	5
Base excision repair	0.214286	0.34656	6
DNA replication	0.2	0.403945	6
Retinol metabolism	0.193548	0.414533	6
N-Glycan biosynthesis	0.152174	0.659721	7
Nucleotide excision repair	0.162162	0.659721	6
Pyrimidine metabolism	0.122222	0.694397	11
Fructose and mannose metabolism	0.15625	0.868834	5
Homologous recombination	0.166667	0.946727	4
Purine metabolism	0.101351	0.998375	15
Oxidative phosphorylation	0.104348	0.998375	12
Spliceosome	0.104762	0.998375	11
Arginine and proline metabolism	0.12	0.998375	6

## Sheet: Detail
#Term	Database	ID	Input number	Background number	P-Value	Corrected P-Value	Input	KEGG_ID/KO	Entrez_ID	Hyperlink
2-Oxocarboxylic acid metabolism	KEGG PATHWAY	gga01210	6	13	0.00109057	0.0760315	ENSGALG00000037211|ENSGALG00000042984|ENSGALG00000036172|ENSGALG00000037401|ENSGALG00000033888|ENSGALG00000030466	gga:418193|gga:100858836|gga:100858836|gga:415362|gga:426573|gga:100858903|	418193|100858836|100858836|415362|426573|100858903|	http://www.genome.jp/kegg-bin/show_pathway?gga01210/gga:415362%09red/gga:418193%09red/gga:426573%09red/gga:100858836%09red/gga:100858903%09red
Metabolic pathways	KEGG PATHWAY	gga01100	102	1049	0.00127384	0.0760315	ENSGALG00000034655|ENSGALG00000036036|ENSGALG00000015240|ENSGALG00000006122|ENSGALG00000001219|ENSGALG00000033683|ENSGALG00000040169|ENSGALG00000042984|ENSGALG00000027501|ENSGALG00000011659|ENSGALG00000037401|ENSGALG00000009598|ENSGALG00000008066|ENSGALG00000032763|ENSGALG00000004047|ENSGALG00000035015|ENSGALG00000043084|ENSGALG00000027688|ENSGALG00000036602|ENSGALG00000041418|ENSGALG00000008508|…	gga:423976|gga:425758|gga:418377|gga:427672|gga:419124|gga:395650|gga:417214|gga:100858836|gga:395667|gga:421587|gga:415362|gga:421348|gga:770937|gga:419601|gga:419686|gga:552895|gga:769292|gga:769954|gga:425758|gga:100857596|gga:421248|gga:422081|gga:426646|gga:420780|gga:378907|gga:421995|gga:416477|gga:101748171|gga:416675|gga:396508|gga:420034|gga:419480|gga:423011|gga:427009|gga:420632|gga:4…	423976|425758|418377|427672|419124|395650|417214|100858836|395667|421587|415362|421348|770937|419601|419686|552895|769292|769954|425758|100857596|421248|422081|426646|420780|378907|421995|416477|101748171|416675|396508|420034|419480|423011|427009|420632|418193|415585|428399|374002|770665|419303|421452|424954|395139|421939|374064|420015|415320|424367|426573|771539|422339|424072|422339|419739|55289…	http://www.genome.jp/kegg-bin/show_pathway?gga01100/gga:396456%09red/gga:418193%09red/gga:426039%09red/gga:417163%09red/gga:419678%09red/gga:426268%09red/gga:395650%09red/gga:428227%09red/gga:395415%09red/gga:770135%09red/gga:428713%09red/gga:421452%09red/gga:421995%09red/gga:100859398%09red/gga:421248%09red/gga:771539%09red/gga:770045%09red/gga:415585%09red/gga:769770%09red/gga:420034%09red/gga:…
Valine, leucine and isoleucine degradation	KEGG PATHWAY	gga00280	10	41	0.00168959	0.0760315	ENSGALG00000016555|ENSGALG00000033207|ENSGALG00000001557|ENSGALG00000037211|ENSGALG00000011659|ENSGALG00000036602|ENSGALG00000040068|ENSGALG00000036036|ENSGALG00000040267|ENSGALG00000020876	gga:421995|gga:420632|gga:419739|gga:418193|gga:421587|gga:425758|gga:425758|gga:425758|gga:423011|gga:424072|	421995|420632|419739|418193|421587|425758|425758|425758|423011|424072|	http://www.genome.jp/kegg-bin/show_pathway?gga00280/gga:423011%09red/gga:418193%09red/gga:419739%09red/gga:425758%09red/gga:421587%09red/gga:424072%09red/gga:420632%09red/gga:421995%09red
Biosynthesis of amino acids	KEGG PATHWAY	gga01230	11	59	0.0061803	0.208585	ENSGALG00000034655|ENSGALG00000033271|ENSGALG00000001992|ENSGALG00000037211|ENSGALG00000042984|ENSGALG00000036172|ENSGALG00000002847|ENSGALG00000033888|ENSGALG00000037401|ENSGALG00000007300|ENSGALG00000030466	gga:423976|gga:374064|gga:396456|gga:418193|gga:100858836|gga:100858836|gga:770045|gga:426573|gga:415362|gga:769203|gga:100858903|	423976|374064|396456|418193|100858836|100858836|770045|426573|415362|769203|100858903|	http://www.genome.jp/kegg-bin/show_pathway?gga01230/gga:423976%09red/gga:100858836%09red/gga:100858903%09red/gga:396456%09red/gga:374064%09red/gga:770045%09red/gga:769203%09red/gga:418193%09red/gga:415362%09red/gga:426573%09red
Porphyrin and chlorophyll metabolism	KEGG PATHWAY	gga00860	6	25	0.0149683	0.320446	ENSGALG00000009598|ENSGALG00000003948|ENSGALG00000006122|ENSGALG00000035015|ENSGALG00000015240|ENSGALG00000001375	gga:421348|gga:552895|gga:427672|gga:552895|gga:418377|gga:417329|	421348|552895|427672|552895|418377|417329|	http://www.genome.jp/kegg-bin/show_pathway?gga00860/gga:552895%09red/gga:418377%09red/gga:421348%09red/gga:427672%09red/gga:417329%09red
Cardiac muscle contraction	KEGG PATHWAY	gga04260	10	60	0.0168778	0.320446	ENSGALG00000030985|ENSGALG00000036964|ENSGALG00000000302|ENSGALG00000008066|ENSGALG00000002563|ENSGALG00000037744|ENSGALG00000000585|ENSGALG00000001096|ENSGALG00000002490|ENSGALG00000001459	gga:395279|gga:100858946|gga:396433|gga:770937|gga:396366|gga:395985|gga:396472|gga:770135|gga:427009|gga:396032|	395279|100858946|396433|770937|396366|395985|396472|770135|427009|396032|	http://www.genome.jp/kegg-bin/show_pathway?gga04260/gga:396472%09red/gga:770937%09red/gga:396433%09red/gga:395985%09red/gga:396032%09red/gga:395279%09red/gga:770135%09red/gga:427009%09red/gga:396366%09red/gga:100858946%09red
Glycosphingolipid biosynthesis - globo series	KEGG PATHWAY	gga00603	4	12	0.0186081	0.320446	ENSGALG00000002651|ENSGALG00000043828|ENSGALG00000004948|ENSGALG00000003340	gga:395139|gga:415320|gga:422188|gga:417163|	395139|415320|422188|417163|	http://www.genome.jp/kegg-bin/show_pathway?gga00603/gga:422188%09red/gga:417163%09red/gga:415320%09red/gga:395139%09red
Glycosaminoglycan biosynthesis - chondroitin sulfate / dermatan sulfate	KEGG PATHWAY	gga00532	5	19	0.0189894	0.320446	ENSGALG00000036477|ENSGALG00000024056|ENSGALG00000032145|ENSGALG00000032915|ENSGALG00000007702	gga:426039|gga:396018|gga:416359|gga:769112|gga:414780|	426039|396018|416359|769112|414780|	http://www.genome.jp/kegg-bin/show_pathway?gga00532/gga:396018%09red/gga:426039%09red/gga:414780%09red/gga:769112%09red/gga:416359%09red
Base excision repair	KEGG PATHWAY	gga03410	6	28	0.023104	0.34656	ENSGALG00000030570|ENSGALG00000033266|ENSGALG00000039384|ENSGALG00000002288|ENSGALG00000001586|ENSGALG00000037932	gga:417530|gga:100859398|gga:416997|gga:417530|gga:770068|gga:100859398|	417530|100859398|416997|417530|770068|100859398|	http://www.genome.jp/kegg-bin/show_pathway?gga03410/gga:417530%09red/gga:416997%09red/gga:770068%09red/gga:100859398%09red
DNA replication	KEGG PATHWAY	gga03030	6	30	0.0299219	0.403945	ENSGALG00000010700|ENSGALG00000033266|ENSGALG00000039384|ENSGALG00000012546|ENSGALG00000041973|ENSGALG00000037932	gga:420578|gga:100859398|gga:416997|gga:418058|gga:426646|gga:100859398|	420578|100859398|416997|418058|426646|100859398|	http://www.genome.jp/kegg-bin/show_pathway?gga03030/gga:418058%09red/gga:426646%09red/gga:420578%09red/gga:416997%09red/gga:100859398%09red
Retinol metabolism	KEGG PATHWAY	gga00830	6	31	0.0337768	0.414533	ENSGALG00000004270|ENSGALG00000004436|ENSGALG00000034358|ENSGALG00000030376|ENSGALG00000020876|ENSGALG00000020160	gga:395844|gga:416477|gga:426549|gga:419480|gga:424072|gga:395979|	395844|416477|426549|419480|424072|395979|	http://www.genome.jp/kegg-bin/show_pathway?gga00830/gga:416477%09red/gga:419480%09red/gga:395979%09red/gga:426549%09red/gga:424072%09red/gga:395844%09red
N-Glycan biosynthesis	KEGG PATHWAY	gga00510	7	46	0.0602967	0.659721	ENSGALG00000007976|ENSGALG00000000225|ENSGALG00000033790|ENSGALG00000017049|ENSGALG00000005066|ENSGALG00000029850|ENSGALG00000008539	gga:422339|gga:395415|gga:415585|gga:418898|gga:771539|gga:422339|gga:417733|	422339|395415|415585|418898|771539|422339|417733|	http://www.genome.jp/kegg-bin/show_pathway?gga00510/gga:771539%09red/gga:418898%09red/gga:417733%09red/gga:422339%09red/gga:415585%09red/gga:395415%09red
Nucleotide excision repair	KEGG PATHWAY	gga03420	6	37	0.0635287	0.659721	ENSGALG00000010700|ENSGALG00000033266|ENSGALG00000039384|ENSGALG00000042333|ENSGALG00000037932|ENSGALG00000028998	gga:420578|gga:100859398|gga:416997|gga:374050|gga:100859398|gga:395659|	420578|100859398|416997|374050|100859398|395659|	http://www.genome.jp/kegg-bin/show_pathway?gga03420/gga:374050%09red/gga:395659%09red/gga:420578%09red/gga:416997%09red/gga:100859398%09red
Pyrimidine metabolism	KEGG PATHWAY	gga00240	11	90	0.0720115	0.694397	ENSGALG00000008563|ENSGALG00000033266|ENSGALG00000039384|ENSGALG00000006040|ENSGALG00000041973|ENSGALG00000010349|ENSGALG00000003651|ENSGALG00000007470|ENSGALG00000008534|ENSGALG00000037932|ENSGALG00000010202	gga:416708|gga:100859398|gga:416997|gga:419255|gga:426646|gga:421452|gga:420034|gga:428713|gga:424954|gga:100859398|gga:423343|	416708|100859398|416997|419255|426646|421452|420034|428713|424954|100859398|423343|	http://www.genome.jp/kegg-bin/show_pathway?gga00240/gga:419255%09red/gga:416708%09red/gga:423343%09red/gga:426646%09red/gga:416997%09red/gga:428713%09red/gga:421452%09red/gga:100859398%09red/gga:420034%09red/gga:424954%09red
Fructose and mannose metabolism	KEGG PATHWAY	gga00051	5	32	0.0965371	0.868834	ENSGALG00000031525|ENSGALG00000039061|ENSGALG00000043084|ENSGALG00000037663|ENSGALG00000033271	gga:420292|gga:770750|gga:769292|gga:424401|gga:374064|	420292|770750|769292|424401|374064|	http://www.genome.jp/kegg-bin/show_pathway?gga00051/gga:420292%09red/gga:374064%09red/gga:424401%09red/gga:769292%09red/gga:770750%09red
Homologous recombination	KEGG PATHWAY	gga03440	4	24	0.112205	0.946727	ENSGALG00000040380|ENSGALG00000010700|ENSGALG00000033266|ENSGALG00000037932	gga:417626|gga:420578|gga:100859398|gga:100859398|	417626|420578|100859398|100859398|	http://www.genome.jp/kegg-bin/show_pathway?gga03440/gga:417626%09red/gga:420578%09red/gga:100859398%09red
Purine metabolism	KEGG PATHWAY	gga00230	15	148	0.125882	0.998375	ENSGALG00000008563|ENSGALG00000005336|ENSGALG00000033266|ENSGALG00000039384|ENSGALG00000001992|ENSGALG00000007470|ENSGALG00000041973|ENSGALG00000037029|ENSGALG00000010349|ENSGALG00000003651|ENSGALG00000003597|ENSGALG00000041763|ENSGALG00000008534|ENSGALG00000037932|ENSGALG00000010202	gga:416708|gga:428399|gga:100859398|gga:416997|gga:396456|gga:428713|gga:426646|gga:769469|gga:421452|gga:420034|gga:428227|gga:768578|gga:424954|gga:100859398|gga:423343|	416708|428399|100859398|416997|396456|428713|426646|769469|421452|420034|428227|768578|424954|100859398|423343|	http://www.genome.jp/kegg-bin/show_pathway?gga00230/gga:424954%09red/gga:423343%09red/gga:426646%09red/gga:396456%09red/gga:768578%09red/gga:416997%09red/gga:428227%09red/gga:428399%09red/gga:428713%09red/gga:421452%09red/gga:416708%09red/gga:769469%09red/gga:420034%09red/gga:100859398%09red
Oxidative phosphorylation	KEGG PATHWAY	gga00190	12	115	0.138609	0.998375	ENSGALG00000016446|ENSGALG00000010091|ENSGALG00000008066|ENSGALG00000004442|ENSGALG00000027688|ENSGALG00000041418|ENSGALG00000005704|ENSGALG00000020754|ENSGALG00000001096|ENSGALG00000002490|ENSGALG00000001375|ENSGALG00000038801	gga:421939|gga:424575|gga:770937|gga:769424|gga:769954|gga:100857596|gga:423763|gga:769770|gga:770135|gga:427009|gga:417329|gga:426673|	421939|424575|770937|769424|769954|100857596|423763|769770|770135|427009|417329|426673|	http://www.genome.jp/kegg-bin/show_pathway?gga00190/gga:421939%09red/gga:424575%09red/gga:769424%09red/gga:423763%09red/gga:770937%09red/gga:417329%09red/gga:769954%09red/gga:426673%09red/gga:770135%09red/gga:427009%09red/gga:769770%09red/gga:100857596%09red
Spliceosome	KEGG PATHWAY	gga03040	11	105	0.148938	0.998375	ENSGALG00000009421|ENSGALG00000006817|ENSGALG00000033120|ENSGALG00000010689|ENSGALG00000040048|ENSGALG00000009257|ENSGALG00000002531|ENSGALG00000009250|ENSGALG00000024172|ENSGALG00000013883|ENSGALG00000013383	gga:423258|gga:419299|gga:426265|gga:374226|gga:430767|gga:422401|gga:415680|gga:100859627|gga:416232|gga:771295|gga:426061|	423258|419299|426265|374226|430767|422401|415680|100859627|416232|771295|426061|	http://www.genome.jp/kegg-bin/show_pathway?gga03040/gga:426061%09red/gga:426265%09red/gga:771295%09red/gga:430767%09red/gga:422401%09red/gga:415680%09red/gga:423258%09red/gga:100859627%09red/gga:374226%09red/gga:419299%09red/gga:416232%09red
Arginine and proline metabolism	KEGG PATHWAY	gga00330	6	50	0.166894	0.998375	ENSGALG00000034655|ENSGALG00000042984|ENSGALG00000008352|ENSGALG00000015602|ENSGALG00000036172|ENSGALG00000007300	gga:423976|gga:100858836|gga:374002|gga:396508|gga:100858836|gga:769203|	423976|100858836|374002|396508|100858836|769203|	http://www.genome.jp/kegg-bin/show_pathway?gga00330/gga:769203%09red/gga:423976%09red/gga:396508%09red/gga:100858836%09red/gga:374002%09red

## Sheet: KEGG enrichment analysis P<0.05
#Term	Database	ID	Input number	Background number	P-Value	Corrected P-Value	Input	KEGG_ID/KO	Entrez_ID	Hyperlink
2-Oxocarboxylic acid metabolism	KEGG PATHWAY	gga01210	6	13	0.00109057	0.0760315	ENSGALG00000037211|ENSGALG00000042984|ENSGALG00000036172|ENSGALG00000037401|ENSGALG00000033888|ENSGALG00000030466	gga:418193|gga:100858836|gga:100858836|gga:415362|gga:426573|gga:100858903|	418193|100858836|100858836|415362|426573|100858903|	http://www.genome.jp/kegg-bin/show_pathway?gga01210/gga:415362%09red/gga:418193%09red/gga:426573%09red/gga:100858836%09red/gga:100858903%09red
Metabolic pathways	KEGG PATHWAY	gga01100	102	1049	0.00127384	0.0760315	ENSGALG00000034655|ENSGALG00000036036|ENSGALG00000015240|ENSGALG00000006122|ENSGALG00000001219|ENSGALG00000033683|ENSGALG00000040169|ENSGALG00000042984|ENSGALG00000027501|ENSGALG00000011659|ENSGALG00000037401|ENSGALG00000009598|ENSGALG00000008066|ENSGALG00000032763|ENSGALG00000004047|ENSGALG00000035015|ENSGALG00000043084|ENSGALG00000027688|ENSGALG00000036602|ENSGALG00000041418|ENSGALG00000008508|…	gga:423976|gga:425758|gga:418377|gga:427672|gga:419124|gga:395650|gga:417214|gga:100858836|gga:395667|gga:421587|gga:415362|gga:421348|gga:770937|gga:419601|gga:419686|gga:552895|gga:769292|gga:769954|gga:425758|gga:100857596|gga:421248|gga:422081|gga:426646|gga:420780|gga:378907|gga:421995|gga:416477|gga:101748171|gga:416675|gga:396508|gga:420034|gga:419480|gga:423011|gga:427009|gga:420632|gga:4…	423976|425758|418377|427672|419124|395650|417214|100858836|395667|421587|415362|421348|770937|419601|419686|552895|769292|769954|425758|100857596|421248|422081|426646|420780|378907|421995|416477|101748171|416675|396508|420034|419480|423011|427009|420632|418193|415585|428399|374002|770665|419303|421452|424954|395139|421939|374064|420015|415320|424367|426573|771539|422339|424072|422339|419739|55289…	http://www.genome.jp/kegg-bin/show_pathway?gga01100/gga:396456%09red/gga:418193%09red/gga:426039%09red/gga:417163%09red/gga:419678%09red/gga:426268%09red/gga:395650%09red/gga:428227%09red/gga:395415%09red/gga:770135%09red/gga:428713%09red/gga:421452%09red/gga:421995%09red/gga:100859398%09red/gga:421248%09red/gga:771539%09red/gga:770045%09red/gga:415585%09red/gga:769770%09red/gga:420034%09red/gga:…
Valine, leucine and isoleucine degradation	KEGG PATHWAY	gga00280	10	41	0.00168959	0.0760315	ENSGALG00000016555|ENSGALG00000033207|ENSGALG00000001557|ENSGALG00000037211|ENSGALG00000011659|ENSGALG00000036602|ENSGALG00000040068|ENSGALG00000036036|ENSGALG00000040267|ENSGALG00000020876	gga:421995|gga:420632|gga:419739|gga:418193|gga:421587|gga:425758|gga:425758|gga:425758|gga:423011|gga:424072|	421995|420632|419739|418193|421587|425758|425758|425758|423011|424072|	http://www.genome.jp/kegg-bin/show_pathway?gga00280/gga:423011%09red/gga:418193%09red/gga:419739%09red/gga:425758%09red/gga:421587%09red/gga:424072%09red/gga:420632%09red/gga:421995%09red
Biosynthesis of amino acids	KEGG PATHWAY	gga01230	11	59	0.0061803	0.208585	ENSGALG00000034655|ENSGALG00000033271|ENSGALG00000001992|ENSGALG00000037211|ENSGALG00000042984|ENSGALG00000036172|ENSGALG00000002847|ENSGALG00000033888|ENSGALG00000037401|ENSGALG00000007300|ENSGALG00000030466	gga:423976|gga:374064|gga:396456|gga:418193|gga:100858836|gga:100858836|gga:770045|gga:426573|gga:415362|gga:769203|gga:100858903|	423976|374064|396456|418193|100858836|100858836|770045|426573|415362|769203|100858903|	http://www.genome.jp/kegg-bin/show_pathway?gga01230/gga:423976%09red/gga:100858836%09red/gga:100858903%09red/gga:396456%09red/gga:374064%09red/gga:770045%09red/gga:769203%09red/gga:418193%09red/gga:415362%09red/gga:426573%09red
Porphyrin and chlorophyll metabolism	KEGG PATHWAY	gga00860	6	25	0.0149683	0.320446	ENSGALG00000009598|ENSGALG00000003948|ENSGALG00000006122|ENSGALG00000035015|ENSGALG00000015240|ENSGALG00000001375	gga:421348|gga:552895|gga:427672|gga:552895|gga:418377|gga:417329|	421348|552895|427672|552895|418377|417329|	http://www.genome.jp/kegg-bin/show_pathway?gga00860/gga:552895%09red/gga:418377%09red/gga:421348%09red/gga:427672%09red/gga:417329%09red
Cardiac muscle contraction	KEGG PATHWAY	gga04260	10	60	0.0168778	0.320446	ENSGALG00000030985|ENSGALG00000036964|ENSGALG00000000302|ENSGALG00000008066|ENSGALG00000002563|ENSGALG00000037744|ENSGALG00000000585|ENSGALG00000001096|ENSGALG00000002490|ENSGALG00000001459	gga:395279|gga:100858946|gga:396433|gga:770937|gga:396366|gga:395985|gga:396472|gga:770135|gga:427009|gga:396032|	395279|100858946|396433|770937|396366|395985|396472|770135|427009|396032|	http://www.genome.jp/kegg-bin/show_pathway?gga04260/gga:396472%09red/gga:770937%09red/gga:396433%09red/gga:395985%09red/gga:396032%09red/gga:395279%09red/gga:770135%09red/gga:427009%09red/gga:396366%09red/gga:100858946%09red
Glycosphingolipid biosynthesis - globo series	KEGG PATHWAY	gga00603	4	12	0.0186081	0.320446	ENSGALG00000002651|ENSGALG00000043828|ENSGALG00000004948|ENSGALG00000003340	gga:395139|gga:415320|gga:422188|gga:417163|	395139|415320|422188|417163|	http://www.genome.jp/kegg-bin/show_pathway?gga00603/gga:422188%09red/gga:417163%09red/gga:415320%09red/gga:395139%09red
Glycosaminoglycan biosynthesis - chondroitin sulfate / dermatan sulfate	KEGG PATHWAY	gga00532	5	19	0.0189894	0.320446	ENSGALG00000036477|ENSGALG00000024056|ENSGALG00000032145|ENSGALG00000032915|ENSGALG00000007702	gga:426039|gga:396018|gga:416359|gga:769112|gga:414780|	426039|396018|416359|769112|414780|	http://www.genome.jp/kegg-bin/show_pathway?gga00532/gga:396018%09red/gga:426039%09red/gga:414780%09red/gga:769112%09red/gga:416359%09red
Base excision repair	KEGG PATHWAY	gga03410	6	28	0.023104	0.34656	ENSGALG00000030570|ENSGALG00000033266|ENSGALG00000039384|ENSGALG00000002288|ENSGALG00000001586|ENSGALG00000037932	gga:417530|gga:100859398|gga:416997|gga:417530|gga:770068|gga:100859398|	417530|100859398|416997|417530|770068|100859398|	http://www.genome.jp/kegg-bin/show_pathway?gga03410/gga:417530%09red/gga:416997%09red/gga:770068%09red/gga:100859398%09red
DNA replication	KEGG PATHWAY	gga03030	6	30	0.0299219	0.403945	ENSGALG00000010700|ENSGALG00000033266|ENSGALG00000039384|ENSGALG00000012546|ENSGALG00000041973|ENSGALG00000037932	gga:420578|gga:100859398|gga:416997|gga:418058|gga:426646|gga:100859398|	420578|100859398|416997|418058|426646|100859398|	http://www.genome.jp/kegg-bin/show_pathway?gga03030/gga:418058%09red/gga:426646%09red/gga:420578%09red/gga:416997%09red/gga:100859398%09red
Retinol metabolism	KEGG PATHWAY	gga00830	6	31	0.0337768	0.414533	ENSGALG00000004270|ENSGALG00000004436|ENSGALG00000034358|ENSGALG00000030376|ENSGALG00000020876|ENSGALG00000020160	gga:395844|gga:416477|gga:426549|gga:419480|gga:424072|gga:395979|	395844|416477|426549|419480|424072|395979|	http://www.genome.jp/kegg-bin/show_pathway?gga00830/gga:416477%09red/gga:419480%09red/gga:395979%09red/gga:426549%09red/gga:424072%09red/gga:395844%09red
