# Supplementary material for: Identification of key miRNAs affecting broilers with valgus–varus deformity by RNA sequencing and analysis of miRNA–mRNA interactions
Source: Royal Society of Chemistry journal article supplement (doi:10.1039/d1mo00011j), 2021-06-07
Supplement: d1mo00011j4.xlsx [file d1mo00011j4.xlsx]

## Sheet: cross gene
21 common elements in "DEMs target genes " and "DE mRNA":			gene_name
ENSGALG00000000919			PIGR
ENSGALG00000010175			HSP90AB1
ENSGALG00000042148			FKBP5
ENSGALG00000008684			EIF4A2
ENSGALG00000028683			SSR3
ENSGALG00000017343			FOLR1
ENSGALG00000022815			AvBD1
ENSGALG00000035267			-
ENSGALG00000029480			TMEM138
ENSGALG00000016563			ASB9
ENSGALG00000011395			SARAF
ENSGALG00000032742			-
ENSGALG00000028749			ACTC2L
ENSGALG00000002548			TLN1
ENSGALG00000016991			ESD
ENSGALG00000033718			-
ENSGALG00000037077			CCR5
ENSGALG00000010924			NFIA
ENSGALG00000042628			ARHGAP23
ENSGALG00000036172			-
ENSGALG00000042984			-

## Sheet: DEMs target genes
target_gene
ENSGALG00000000919
ENSGALG00000001586
ENSGALG00000002151
ENSGALG00000003348
ENSGALG00000003349
ENSGALG00000004383
ENSGALG00000004442
ENSGALG00000005951
ENSGALG00000007350
ENSGALG00000007520
ENSGALG00000008139
ENSGALG00000009875
ENSGALG00000023142
ENSGALG00000011650
ENSGALG00000011970
ENSGALG00000012269
ENSGALG00000012587
ENSGALG00000013602
ENSGALG00000015602
ENSGALG00000021572
ENSGALG00000006916
ENSGALG00000001201
ENSGALG00000000164
ENSGALG00000027762
ENSGALG00000027494
ENSGALG00000032986
ENSGALG00000032986
ENSGALG00000037828
ENSGALG00000021572
ENSGALG00000027494
ENSGALG00000034358
ENSGALG00000032986
ENSGALG00000027494
ENSGALG00000039897
ENSGALG00000031512
ENSGALG00000031832
ENSGALG00000039325
ENSGALG00000008139
ENSGALG00000027762
ENSGALG00000043605
ENSGALG00000038145
ENSGALG00000033888
ENSGALG00000037171
ENSGALG00000036642
ENSGALG00000029980
ENSGALG00000043261
ENSGALG00000007268
ENSGALG00000033017
ENSGALG00000005745
ENSGALG00000012587
ENSGALG00000012587
ENSGALG00000038145
ENSGALG00000000516
ENSGALG00000006069
ENSGALG00000027762
ENSGALG00000029980
ENSGALG00000007027
ENSGALG00000012587
ENSGALG00000038145
ENSGALG00000002151
ENSGALG00000003405
ENSGALG00000000919
ENSGALG00000000441
ENSGALG00000000542
ENSGALG00000001824
ENSGALG00000001992
ENSGALG00000004176
ENSGALG00000004444
ENSGALG00000006693
ENSGALG00000007152
ENSGALG00000007531
ENSGALG00000008352
ENSGALG00000008563
ENSGALG00000009709
ENSGALG00000010301
ENSGALG00000010349
ENSGALG00000010588
ENSGALG00000011162
ENSGALG00000011326
ENSGALG00000016222
ENSGALG00000017627
ENSGALG00000019114
ENSGALG00000020160
ENSGALG00000020160
ENSGALG00000005849
ENSGALG00000001992
ENSGALG00000016433
ENSGALG00000026663
ENSGALG00000021450
ENSGALG00000007437
ENSGALG00000010349
ENSGALG00000010301
ENSGALG00000037148
ENSGALG00000010301
ENSGALG00000021450
ENSGALG00000001503
ENSGALG00000036452
ENSGALG00000033656
ENSGALG00000010175
ENSGALG00000016433
ENSGALG00000010349
ENSGALG00000008819
ENSGALG00000021450
ENSGALG00000033204
ENSGALG00000002395
ENSGALG00000032145
ENSGALG00000021450
ENSGALG00000029569
ENSGALG00000042148
ENSGALG00000036452
ENSGALG00000019114
ENSGALG00000020160
ENSGALG00000041973
ENSGALG00000016222
ENSGALG00000039783
ENSGALG00000035530
ENSGALG00000003696
ENSGALG00000008563
ENSGALG00000010301
ENSGALG00000001992
ENSGALG00000010349
ENSGALG00000040891
ENSGALG00000016894
ENSGALG00000016433
ENSGALG00000027688
ENSGALG00000039783
ENSGALG00000003696
ENSGALG00000039783
ENSGALG00000011800
ENSGALG00000016894
ENSGALG00000041973
ENSGALG00000011326
ENSGALG00000001021
ENSGALG00000002925
ENSGALG00000012587
ENSGALG00000002925
ENSGALG00000011388
ENSGALG00000001160
ENSGALG00000001219
ENSGALG00000002634
ENSGALG00000003211
ENSGALG00000003563
ENSGALG00000004948
ENSGALG00000005017
ENSGALG00000007511
ENSGALG00000009551
ENSGALG00000011017
ENSGALG00000020151
ENSGALG00000021340
ENSGALG00000024056
ENSGALG00000026734
ENSGALG00000033185
ENSGALG00000041956
ENSGALG00000006207
ENSGALG00000037186
ENSGALG00000031518
ENSGALG00000041956
ENSGALG00000030563
ENSGALG00000021340
ENSGALG00000020151
ENSGALG00000021340
ENSGALG00000035100
ENSGALG00000021340
ENSGALG00000039061
ENSGALG00000021340
ENSGALG00000038801
ENSGALG00000009551
ENSGALG00000001718
ENSGALG00000006817
ENSGALG00000021340
ENSGALG00000000201
ENSGALG00000001446
ENSGALG00000013617
ENSGALG00000002189
ENSGALG00000030636
ENSGALG00000001446
ENSGALG00000013617
ENSGALG00000005551
ENSGALG00000001036
ENSGALG00000001586
ENSGALG00000002919
ENSGALG00000003348
ENSGALG00000004503
ENSGALG00000004505
ENSGALG00000004614
ENSGALG00000005951
ENSGALG00000007130
ENSGALG00000007300
ENSGALG00000007350
ENSGALG00000007531
ENSGALG00000007702
ENSGALG00000007809
ENSGALG00000008040
ENSGALG00000008114
ENSGALG00000009875
ENSGALG00000010357
ENSGALG00000010583
ENSGALG00000011659
ENSGALG00000012220
ENSGALG00000012464
ENSGALG00000012587
ENSGALG00000013602
ENSGALG00000014485
ENSGALG00000019796
ENSGALG00000020342
ENSGALG00000015602
ENSGALG00000004270
ENSGALG00000011419
ENSGALG00000026086
ENSGALG00000023437
ENSGALG00000002160
ENSGALG00000025882
ENSGALG00000024449
ENSGALG00000027762
ENSGALG00000026431
ENSGALG00000037139
ENSGALG00000032986
ENSGALG00000032986
ENSGALG00000042153
ENSGALG00000039125
ENSGALG00000037828
ENSGALG00000034358
ENSGALG00000037139
ENSGALG00000040722
ENSGALG00000001036
ENSGALG00000032986
ENSGALG00000042232
ENSGALG00000039897
ENSGALG00000004614
ENSGALG00000040298
ENSGALG00000031512
ENSGALG00000040298
ENSGALG00000006806
ENSGALG00000041153
ENSGALG00000035023
ENSGALG00000007300
ENSGALG00000006956
ENSGALG00000030003
ENSGALG00000008114
ENSGALG00000033171
ENSGALG00000042611
ENSGALG00000030985
ENSGALG00000037082
ENSGALG00000008114
ENSGALG00000033116
ENSGALG00000027762
ENSGALG00000043605
ENSGALG00000007300
ENSGALG00000041102
ENSGALG00000042611
ENSGALG00000033116
ENSGALG00000042148
ENSGALG00000041442
ENSGALG00000032658
ENSGALG00000033888
ENSGALG00000035079
ENSGALG00000036642
ENSGALG00000029980
ENSGALG00000033017
ENSGALG00000039242
ENSGALG00000033672
ENSGALG00000012587
ENSGALG00000012587
ENSGALG00000012041
ENSGALG00000008114
ENSGALG00000042611
ENSGALG00000004270
ENSGALG00000024449
ENSGALG00000042611
ENSGALG00000002651
ENSGALG00000000516
ENSGALG00000042611
ENSGALG00000030003
ENSGALG00000008114
ENSGALG00000042611
ENSGALG00000006069
ENSGALG00000033116
ENSGALG00000033116
ENSGALG00000027762
ENSGALG00000007300
ENSGALG00000011419
ENSGALG00000029980
ENSGALG00000008367
ENSGALG00000000424
ENSGALG00000035023
ENSGALG00000007027
ENSGALG00000012587
ENSGALG00000026086
ENSGALG00000033672
ENSGALG00000003405
ENSGALG00000000891
ENSGALG00000001571
ENSGALG00000002151
ENSGALG00000003355
ENSGALG00000008127
ENSGALG00000008684
ENSGALG00000012178
ENSGALG00000008508
ENSGALG00000027891
ENSGALG00000031002
ENSGALG00000031002
ENSGALG00000039170
ENSGALG00000026159
ENSGALG00000040157
ENSGALG00000000891
ENSGALG00000030030
ENSGALG00000035462
ENSGALG00000039432
ENSGALG00000000853
ENSGALG00000007767
ENSGALG00000031002
ENSGALG00000007767
ENSGALG00000035295
ENSGALG00000003319
ENSGALG00000000853
ENSGALG00000026159
ENSGALG00000009031
ENSGALG00000009031
ENSGALG00000040157
ENSGALG00000035462
ENSGALG00000000853
ENSGALG00000002151
ENSGALG00000002129
ENSGALG00000002426
ENSGALG00000003078
ENSGALG00000026271
ENSGALG00000004047
ENSGALG00000006395
ENSGALG00000006519
ENSGALG00000008275
ENSGALG00000011652
ENSGALG00000011904
ENSGALG00000014573
ENSGALG00000013865
ENSGALG00000005704
ENSGALG00000021627
ENSGALG00000008620
ENSGALG00000028683
ENSGALG00000028706
ENSGALG00000011652
ENSGALG00000004367
ENSGALG00000033570
ENSGALG00000033862
ENSGALG00000041401
ENSGALG00000001551
ENSGALG00000040622
ENSGALG00000040169
ENSGALG00000016779
ENSGALG00000035295
ENSGALG00000006806
ENSGALG00000006395
ENSGALG00000011904
ENSGALG00000033862
ENSGALG00000033207
ENSGALG00000004667
ENSGALG00000036659
ENSGALG00000035156
ENSGALG00000041401
ENSGALG00000036938
ENSGALG00000011176
ENSGALG00000005336
ENSGALG00000040185
ENSGALG00000032039
ENSGALG00000041927
ENSGALG00000030255
ENSGALG00000005336
ENSGALG00000011210
ENSGALG00000005336
ENSGALG00000006412
ENSGALG00000005357
ENSGALG00000010689
ENSGALG00000024326
ENSGALG00000003221
ENSGALG00000004831
ENSGALG00000005704
ENSGALG00000015200
ENSGALG00000014060
ENSGALG00000005489
ENSGALG00000014060
ENSGALG00000032329
ENSGALG00000032329
ENSGALG00000014060
ENSGALG00000000891
ENSGALG00000008127
ENSGALG00000008684
ENSGALG00000012178
ENSGALG00000014194
ENSGALG00000031002
ENSGALG00000038948
ENSGALG00000040157
ENSGALG00000000891
ENSGALG00000035462
ENSGALG00000039432
ENSGALG00000031002
ENSGALG00000038948
ENSGALG00000009031
ENSGALG00000009031
ENSGALG00000000223
ENSGALG00000040157
ENSGALG00000035462
ENSGALG00000008684
ENSGALG00000012178
ENSGALG00000014194
ENSGALG00000031002
ENSGALG00000038948
ENSGALG00000040157
ENSGALG00000035462
ENSGALG00000039432
ENSGALG00000031002
ENSGALG00000038948
ENSGALG00000009031
ENSGALG00000009031
ENSGALG00000040157
ENSGALG00000035462
ENSGALG00000009959
ENSGALG00000012312
ENSGALG00000020342
ENSGALG00000022750
ENSGALG00000009959
ENSGALG00000030857
ENSGALG00000042767
ENSGALG00000009959
ENSGALG00000042767
ENSGALG00000009112
ENSGALG00000042767
ENSGALG00000012312
ENSGALG00000009112
ENSGALG00000042767
ENSGALG00000000284
ENSGALG00000000441
ENSGALG00000000442
ENSGALG00000000542
ENSGALG00000000607
ENSGALG00000000993
ENSGALG00000000998
ENSGALG00000001118
ENSGALG00000001144
ENSGALG00000024296
ENSGALG00000001534
ENSGALG00000001617
ENSGALG00000001620
ENSGALG00000001824
ENSGALG00000002131
ENSGALG00000002316
ENSGALG00000002848
ENSGALG00000003086
ENSGALG00000003340
ENSGALG00000003695
ENSGALG00000004176
ENSGALG00000004383
ENSGALG00000005951
ENSGALG00000011450
ENSGALG00000006539
ENSGALG00000006693
ENSGALG00000007152
ENSGALG00000007300
ENSGALG00000007418
ENSGALG00000007492
ENSGALG00000007513
ENSGALG00000007531
ENSGALG00000007967
ENSGALG00000008023
ENSGALG00000008066
ENSGALG00000008132
ENSGALG00000008352
ENSGALG00000008563
ENSGALG00000008796
ENSGALG00000009709
ENSGALG00000010301
ENSGALG00000010349
ENSGALG00000010588
ENSGALG00000011326
ENSGALG00000011353
ENSGALG00000012287
ENSGALG00000013668
ENSGALG00000013883
ENSGALG00000014124
ENSGALG00000014723
ENSGALG00000015240
ENSGALG00000016222
ENSGALG00000016555
ENSGALG00000016670
ENSGALG00000017343
ENSGALG00000014182
ENSGALG00000017627
ENSGALG00000019114
ENSGALG00000000302
ENSGALG00000013804
ENSGALG00000020160
ENSGALG00000020160
ENSGALG00000020342
ENSGALG00000012244
ENSGALG00000008073
ENSGALG00000005849
ENSGALG00000002847
ENSGALG00000022815
ENSGALG00000008405
ENSGALG00000024083
ENSGALG00000024379
ENSGALG00000026663
ENSGALG00000026070
ENSGALG00000027902
ENSGALG00000028506
ENSGALG00000005769
ENSGALG00000025772
ENSGALG00000026945
ENSGALG00000031525
ENSGALG00000021450
ENSGALG00000031002
ENSGALG00000038421
ENSGALG00000010349
ENSGALG00000033266
ENSGALG00000031735
ENSGALG00000042837
ENSGALG00000010401
ENSGALG00000037160
ENSGALG00000010301
ENSGALG00000037852
ENSGALG00000037148
ENSGALG00000012244
ENSGALG00000010301
ENSGALG00000038879
ENSGALG00000021450
ENSGALG00000032173
ENSGALG00000040573
ENSGALG00000008023
ENSGALG00000035267
ENSGALG00000038879
ENSGALG00000008051
ENSGALG00000032876
ENSGALG00000006539
ENSGALG00000009250
ENSGALG00000004197
ENSGALG00000005140
ENSGALG00000034655
ENSGALG00000032173
ENSGALG00000010349
ENSGALG00000037932
ENSGALG00000002899
ENSGALG00000036452
ENSGALG00000031525
ENSGALG00000033656
ENSGALG00000010175
ENSGALG00000038879
ENSGALG00000010349
ENSGALG00000039432
ENSGALG00000011394
ENSGALG00000007300
ENSGALG00000031525
ENSGALG00000002519
ENSGALG00000040891
ENSGALG00000029480
ENSGALG00000031553
ENSGALG00000008819
ENSGALG00000011450
ENSGALG00000036870
ENSGALG00000039982
ENSGALG00000021450
ENSGALG00000033204
ENSGALG00000006040
ENSGALG00000002395
ENSGALG00000024296
ENSGALG00000035267
ENSGALG00000040917
ENSGALG00000005653
ENSGALG00000032145
ENSGALG00000037852
ENSGALG00000035676
ENSGALG00000000998
ENSGALG00000007300
ENSGALG00000037432
ENSGALG00000042822
ENSGALG00000038789
ENSGALG00000021450
ENSGALG00000029480
ENSGALG00000029569
ENSGALG00000042148
ENSGALG00000040891
ENSGALG00000042073
ENSGALG00000041778
ENSGALG00000040891
ENSGALG00000036452
ENSGALG00000002908
ENSGALG00000037849
ENSGALG00000030095
ENSGALG00000019114
ENSGALG00000020160
ENSGALG00000010283
ENSGALG00000041973
ENSGALG00000016222
ENSGALG00000039783
ENSGALG00000029246
ENSGALG00000013383
ENSGALG00000033017
ENSGALG00000034132
ENSGALG00000041226
ENSGALG00000030342
ENSGALG00000035530
ENSGALG00000033266
ENSGALG00000037160
ENSGALG00000015273
ENSGALG00000014555
ENSGALG00000033266
ENSGALG00000003696
ENSGALG00000000302
ENSGALG00000037932
ENSGALG00000013804
ENSGALG00000016563
ENSGALG00000008563
ENSGALG00000016555
ENSGALG00000002847
ENSGALG00000008796
ENSGALG00000012388
ENSGALG00000042073
ENSGALG00000010401
ENSGALG00000010301
ENSGALG00000010349
ENSGALG00000016555
ENSGALG00000038879
ENSGALG00000016345
ENSGALG00000034124
ENSGALG00000029480
ENSGALG00000016345
ENSGALG00000008267
ENSGALG00000010349
ENSGALG00000040891
ENSGALG00000016894
ENSGALG00000042073
ENSGALG00000002131
ENSGALG00000037932
ENSGALG00000005769
ENSGALG00000032173
ENSGALG00000032915
ENSGALG00000027688
ENSGALG00000014555
ENSGALG00000008796
ENSGALG00000003323
ENSGALG00000037932
ENSGALG00000007513
ENSGALG00000039783
ENSGALG00000003696
ENSGALG00000038879
ENSGALG00000007300
ENSGALG00000042073
ENSGALG00000039783
ENSGALG00000011800
ENSGALG00000002519
ENSGALG00000000998
ENSGALG00000011450
ENSGALG00000016894
ENSGALG00000037932
ENSGALG00000016945
ENSGALG00000033266
ENSGALG00000033266
ENSGALG00000041973
ENSGALG00000027245
ENSGALG00000040891
ENSGALG00000003690
ENSGALG00000011326
ENSGALG00000013383
ENSGALG00000010091
ENSGALG00000008819
ENSGALG00000005688
ENSGALG00000027654
ENSGALG00000003487
ENSGALG00000004623
ENSGALG00000009598
ENSGALG00000027483
ENSGALG00000017079
ENSGALG00000002922
ENSGALG00000030863
ENSGALG00000004623
ENSGALG00000043573
ENSGALG00000037413
ENSGALG00000036477
ENSGALG00000011395
ENSGALG00000017079
ENSGALG00000036477
ENSGALG00000003344
ENSGALG00000000950
ENSGALG00000001586
ENSGALG00000001620
ENSGALG00000002615
ENSGALG00000002651
ENSGALG00000002919
ENSGALG00000003199
ENSGALG00000003348
ENSGALG00000003563
ENSGALG00000004273
ENSGALG00000004503
ENSGALG00000004505
ENSGALG00000005066
ENSGALG00000005541
ENSGALG00000005553
ENSGALG00000005951
ENSGALG00000006122
ENSGALG00000007130
ENSGALG00000007300
ENSGALG00000007350
ENSGALG00000007531
ENSGALG00000008139
ENSGALG00000020876
ENSGALG00000009421
ENSGALG00000009875
ENSGALG00000010357
ENSGALG00000010878
ENSGALG00000011659
ENSGALG00000027665
ENSGALG00000012464
ENSGALG00000012546
ENSGALG00000012587
ENSGALG00000013881
ENSGALG00000014485
ENSGALG00000016667
ENSGALG00000016875
ENSGALG00000019568
ENSGALG00000020342
ENSGALG00000015602
ENSGALG00000006161
ENSGALG00000021442
ENSGALG00000021647
ENSGALG00000012958
ENSGALG00000023348
ENSGALG00000026086
ENSGALG00000008713
ENSGALG00000024083
ENSGALG00000000164
ENSGALG00000025882
ENSGALG00000024122
ENSGALG00000024449
ENSGALG00000027762
ENSGALG00000028119
ENSGALG00000005553
ENSGALG00000027611
ENSGALG00000027494
ENSGALG00000032986
ENSGALG00000043831
ENSGALG00000008255
ENSGALG00000032986
ENSGALG00000040048
ENSGALG00000042153
ENSGALG00000016737
ENSGALG00000039125
ENSGALG00000037828
ENSGALG00000035080
ENSGALG00000032742
ENSGALG00000035194
ENSGALG00000027494
ENSGALG00000033149
ENSGALG00000034358
ENSGALG00000008255
ENSGALG00000028749
ENSGALG00000003563
ENSGALG00000002971
ENSGALG00000040722
ENSGALG00000040267
ENSGALG00000032986
ENSGALG00000020876
ENSGALG00000042232
ENSGALG00000027494
ENSGALG00000039897
ENSGALG00000032742
ENSGALG00000007651
ENSGALG00000007887
ENSGALG00000011178
ENSGALG00000040298
ENSGALG00000000946
ENSGALG00000031512
ENSGALG00000036964
ENSGALG00000006806
ENSGALG00000005541
ENSGALG00000001992
ENSGALG00000007300
ENSGALG00000006956
ENSGALG00000043828
ENSGALG00000040576
ENSGALG00000033171
ENSGALG00000032590
ENSGALG00000042611
ENSGALG00000030985
ENSGALG00000039982
ENSGALG00000008139
ENSGALG00000033116
ENSGALG00000027762
ENSGALG00000043605
ENSGALG00000008114
ENSGALG00000007300
ENSGALG00000042611
ENSGALG00000033116
ENSGALG00000042148
ENSGALG00000042452
ENSGALG00000041442
ENSGALG00000043828
ENSGALG00000033888
ENSGALG00000037029
ENSGALG00000036642
ENSGALG00000029980
ENSGALG00000008404
ENSGALG00000033017
ENSGALG00000039242
ENSGALG00000033672
ENSGALG00000012587
ENSGALG00000012546
ENSGALG00000008713
ENSGALG00000042611
ENSGALG00000024449
ENSGALG00000042611
ENSGALG00000001608
ENSGALG00000035080
ENSGALG00000002651
ENSGALG00000007350
ENSGALG00000000516
ENSGALG00000042611
ENSGALG00000046338
ENSGALG00000042611
ENSGALG00000042452
ENSGALG00000011178
ENSGALG00000043831
ENSGALG00000040048
ENSGALG00000033116
ENSGALG00000033116
ENSGALG00000027762
ENSGALG00000007300
ENSGALG00000029980
ENSGALG00000000424
ENSGALG00000030979
ENSGALG00000007027
ENSGALG00000012587
ENSGALG00000026086
ENSGALG00000033672
ENSGALG00000001550
ENSGALG00000002362
ENSGALG00000003665
ENSGALG00000007101
ENSGALG00000024398
ENSGALG00000026374
ENSGALG00000026055
ENSGALG00000032184
ENSGALG00000030941
ENSGALG00000000726
ENSGALG00000026055
ENSGALG00000007101
ENSGALG00000006436
ENSGALG00000017097
ENSGALG00000005885
ENSGALG00000006776
ENSGALG00000002866
ENSGALG00000032428
ENSGALG00000039376
ENSGALG00000005885
ENSGALG00000027654
ENSGALG00000036417
ENSGALG00000043336
ENSGALG00000031859
ENSGALG00000031859
ENSGALG00000003288
ENSGALG00000010322
ENSGALG00000012236
ENSGALG00000008608
ENSGALG00000008608
ENSGALG00000033232
ENSGALG00000001055
ENSGALG00000007976
ENSGALG00000012312
ENSGALG00000016779
ENSGALG00000033271
ENSGALG00000041962
ENSGALG00000032993
ENSGALG00000032993
ENSGALG00000012312
ENSGALG00000038338
ENSGALG00000000284
ENSGALG00000000441
ENSGALG00000000542
ENSGALG00000000998
ENSGALG00000001824
ENSGALG00000001992
ENSGALG00000002131
ENSGALG00000002316
ENSGALG00000002848
ENSGALG00000003086
ENSGALG00000003340
ENSGALG00000003695
ENSGALG00000004328
ENSGALG00000004383
ENSGALG00000004897
ENSGALG00000005951
ENSGALG00000006693
ENSGALG00000007152
ENSGALG00000007418
ENSGALG00000007492
ENSGALG00000007531
ENSGALG00000008132
ENSGALG00000008352
ENSGALG00000008563
ENSGALG00000009709
ENSGALG00000010301
ENSGALG00000010349
ENSGALG00000010588
ENSGALG00000011326
ENSGALG00000011353
ENSGALG00000013883
ENSGALG00000014124
ENSGALG00000015240
ENSGALG00000016222
ENSGALG00000017343
ENSGALG00000017627
ENSGALG00000019114
ENSGALG00000000302
ENSGALG00000020160
ENSGALG00000020160
ENSGALG00000008073
ENSGALG00000005849
ENSGALG00000002847
ENSGALG00000022815
ENSGALG00000008405
ENSGALG00000024083
ENSGALG00000024379
ENSGALG00000026663
ENSGALG00000027902
ENSGALG00000026945
ENSGALG00000039920
ENSGALG00000021450
ENSGALG00000031002
ENSGALG00000010349
ENSGALG00000033266
ENSGALG00000010401
ENSGALG00000037160
ENSGALG00000010301
ENSGALG00000037852
ENSGALG00000037148
ENSGALG00000010301
ENSGALG00000038879
ENSGALG00000021450
ENSGALG00000042894
ENSGALG00000038879
ENSGALG00000004197
ENSGALG00000032173
ENSGALG00000010349
ENSGALG00000037932
ENSGALG00000036452
ENSGALG00000033656
ENSGALG00000010175
ENSGALG00000038879
ENSGALG00000010349
ENSGALG00000002519
ENSGALG00000040891
ENSGALG00000031553
ENSGALG00000008819
ENSGALG00000039982
ENSGALG00000021450
ENSGALG00000033204
ENSGALG00000006040
ENSGALG00000035156
ENSGALG00000042894
ENSGALG00000002395
ENSGALG00000040917
ENSGALG00000032145
ENSGALG00000037852
ENSGALG00000000998
ENSGALG00000021450
ENSGALG00000029480
ENSGALG00000029569
ENSGALG00000042148
ENSGALG00000040891
ENSGALG00000042073
ENSGALG00000041778
ENSGALG00000040891
ENSGALG00000036452
ENSGALG00000037849
ENSGALG00000030095
ENSGALG00000019114
ENSGALG00000020160
ENSGALG00000041973
ENSGALG00000016222
ENSGALG00000039783
ENSGALG00000041763
ENSGALG00000033017
ENSGALG00000035530
ENSGALG00000033266
ENSGALG00000037160
ENSGALG00000033266
ENSGALG00000003696
ENSGALG00000000302
ENSGALG00000037932
ENSGALG00000016563
ENSGALG00000008563
ENSGALG00000002847
ENSGALG00000042073
ENSGALG00000010401
ENSGALG00000010301
ENSGALG00000010349
ENSGALG00000016345
ENSGALG00000010202
ENSGALG00000029480
ENSGALG00000016345
ENSGALG00000008267
ENSGALG00000010349
ENSGALG00000040891
ENSGALG00000016894
ENSGALG00000042073
ENSGALG00000002131
ENSGALG00000037932
ENSGALG00000032915
ENSGALG00000027688
ENSGALG00000003323
ENSGALG00000037932
ENSGALG00000039783
ENSGALG00000003696
ENSGALG00000038879
ENSGALG00000042073
ENSGALG00000039783
ENSGALG00000011800
ENSGALG00000044101
ENSGALG00000002519
ENSGALG00000000998
ENSGALG00000016894
ENSGALG00000037932
ENSGALG00000033266
ENSGALG00000033266
ENSGALG00000041973
ENSGALG00000042894
ENSGALG00000040891
ENSGALG00000003690
ENSGALG00000011326
ENSGALG00000002490
ENSGALG00000003435
ENSGALG00000005017
ENSGALG00000005644
ENSGALG00000009073
ENSGALG00000013916
ENSGALG00000030305
ENSGALG00000035174
ENSGALG00000034693
ENSGALG00000039490
ENSGALG00000002490
ENSGALG00000002490
ENSGALG00000000585
ENSGALG00000006486
ENSGALG00000013173
ENSGALG00000034831
ENSGALG00000003282
ENSGALG00000003282
ENSGALG00000042828
ENSGALG00000004193
ENSGALG00000032048
ENSGALG00000034831
ENSGALG00000032400
ENSGALG00000034831
ENSGALG00000012587
ENSGALG00000012587
ENSGALG00000033683
ENSGALG00000001362
ENSGALG00000001394
ENSGALG00000003701
ENSGALG00000004446
ENSGALG00000004767
ENSGALG00000006441
ENSGALG00000013828
ENSGALG00000015786
ENSGALG00000021686
ENSGALG00000010293
ENSGALG00000004817
ENSGALG00000030863
ENSGALG00000035882
ENSGALG00000031099
ENSGALG00000001362
ENSGALG00000031203
ENSGALG00000001394
ENSGALG00000000225
ENSGALG00000042071
ENSGALG00000038633
ENSGALG00000038550
ENSGALG00000036168
ENSGALG00000032672
ENSGALG00000043130
ENSGALG00000036627
ENSGALG00000030967
ENSGALG00000013828
ENSGALG00000001362
ENSGALG00000031203
ENSGALG00000043130
ENSGALG00000013828
ENSGALG00000001394
ENSGALG00000000314
ENSGALG00000001141
ENSGALG00000001459
ENSGALG00000001483
ENSGALG00000001558
ENSGALG00000001632
ENSGALG00000001883
ENSGALG00000002345
ENSGALG00000002615
ENSGALG00000004336
ENSGALG00000004378
ENSGALG00000005305
ENSGALG00000006821
ENSGALG00000007350
ENSGALG00000007618
ENSGALG00000008746
ENSGALG00000009730
ENSGALG00000013189
ENSGALG00000013232
ENSGALG00000013383
ENSGALG00000013759
ENSGALG00000013878
ENSGALG00000014054
ENSGALG00000016089
ENSGALG00000015382
ENSGALG00000023626
ENSGALG00000008508
ENSGALG00000029118
ENSGALG00000029023
ENSGALG00000028119
ENSGALG00000028940
ENSGALG00000026563
ENSGALG00000027874
ENSGALG00000041767
ENSGALG00000037663
ENSGALG00000014054
ENSGALG00000035677
ENSGALG00000037807
ENSGALG00000042863
ENSGALG00000030179
ENSGALG00000033622
ENSGALG00000033452
ENSGALG00000020754
ENSGALG00000042929
ENSGALG00000030270
ENSGALG00000033522
ENSGALG00000032763
ENSGALG00000040904
ENSGALG00000033120
ENSGALG00000014054
ENSGALG00000030597
ENSGALG00000035744
ENSGALG00000037811
ENSGALG00000010078
ENSGALG00000008114
ENSGALG00000000950
ENSGALG00000011394
ENSGALG00000000223
ENSGALG00000019768
ENSGALG00000012721
ENSGALG00000042452
ENSGALG00000012721
ENSGALG00000042095
ENSGALG00000013232
ENSGALG00000007519
ENSGALG00000042929
ENSGALG00000010078
ENSGALG00000030255
ENSGALG00000042077
ENSGALG00000034272
ENSGALG00000015773
ENSGALG00000005090
ENSGALG00000006821
ENSGALG00000041708
ENSGALG00000038219
ENSGALG00000039242
ENSGALG00000032730
ENSGALG00000031606
ENSGALG00000011394
ENSGALG00000016855
ENSGALG00000033452
ENSGALG00000033522
ENSGALG00000013232
ENSGALG00000042452
ENSGALG00000034124
ENSGALG00000000314
ENSGALG00000000223
ENSGALG00000028940
ENSGALG00000011570
ENSGALG00000000223
ENSGALG00000030597
ENSGALG00000037807
ENSGALG00000001238
ENSGALG00000001141
ENSGALG00000003405
ENSGALG00000000314
ENSGALG00000040247
ENSGALG00000033993
ENSGALG00000012721
ENSGALG00000036638
ENSGALG00000044101
ENSGALG00000001905
ENSGALG00000001975
ENSGALG00000002531
ENSGALG00000002919
ENSGALG00000003348
ENSGALG00000003405
ENSGALG00000004383
ENSGALG00000004436
ENSGALG00000004503
ENSGALG00000004505
ENSGALG00000005541
ENSGALG00000005713
ENSGALG00000005951
ENSGALG00000006122
ENSGALG00000006149
ENSGALG00000006956
ENSGALG00000007350
ENSGALG00000007531
ENSGALG00000007702
ENSGALG00000008040
ENSGALG00000008139
ENSGALG00000008473
ENSGALG00000009875
ENSGALG00000010276
ENSGALG00000010357
ENSGALG00000010878
ENSGALG00000011326
ENSGALG00000012220
ENSGALG00000012269
ENSGALG00000014485
ENSGALG00000019796
ENSGALG00000020342
ENSGALG00000015602
ENSGALG00000020754
ENSGALG00000023348
ENSGALG00000023772
ENSGALG00000024083
ENSGALG00000021542
ENSGALG00000024449
ENSGALG00000027762
ENSGALG00000027611
ENSGALG00000027494
ENSGALG00000032986
ENSGALG00000032986
ENSGALG00000040048
ENSGALG00000042153
ENSGALG00000016737
ENSGALG00000039125
ENSGALG00000035080
ENSGALG00000027494
ENSGALG00000005713
ENSGALG00000034358
ENSGALG00000038109
ENSGALG00000005713
ENSGALG00000039734
ENSGALG00000030131
ENSGALG00000040722
ENSGALG00000032986
ENSGALG00000042232
ENSGALG00000015652
ENSGALG00000027494
ENSGALG00000036519
ENSGALG00000007887
ENSGALG00000031512
ENSGALG00000037395
ENSGALG00000005541
ENSGALG00000006956
ENSGALG00000033171
ENSGALG00000042611
ENSGALG00000030985
ENSGALG00000040672
ENSGALG00000008139
ENSGALG00000033116
ENSGALG00000033163
ENSGALG00000027762
ENSGALG00000043605
ENSGALG00000036572
ENSGALG00000007767
ENSGALG00000002558
ENSGALG00000036572
ENSGALG00000042611
ENSGALG00000038789
ENSGALG00000034354
ENSGALG00000033116
ENSGALG00000041962
ENSGALG00000042148
ENSGALG00000036572
ENSGALG00000002548
ENSGALG00000033888
ENSGALG00000036642
ENSGALG00000029980
ENSGALG00000033163
ENSGALG00000032220
ENSGALG00000034354
ENSGALG00000035576
ENSGALG00000036519
ENSGALG00000033672
ENSGALG00000012041
ENSGALG00000042611
ENSGALG00000011865
ENSGALG00000024449
ENSGALG00000042611
ENSGALG00000046464
ENSGALG00000033163
ENSGALG00000035080
ENSGALG00000002651
ENSGALG00000007350
ENSGALG00000010193
ENSGALG00000000516
ENSGALG00000042611
ENSGALG00000046338
ENSGALG00000042611
ENSGALG00000006069
ENSGALG00000034354
ENSGALG00000021542
ENSGALG00000040048
ENSGALG00000033116
ENSGALG00000033116
ENSGALG00000027762
ENSGALG00000028998
ENSGALG00000029980
ENSGALG00000000424
ENSGALG00000007027
ENSGALG00000033672
ENSGALG00000003405
ENSGALG00000011326
ENSGALG00000010746
ENSGALG00000012312
ENSGALG00000016991
ENSGALG00000020342
ENSGALG00000022750
ENSGALG00000023950
ENSGALG00000026846
ENSGALG00000038671
ENSGALG00000016779
ENSGALG00000016991
ENSGALG00000031542
ENSGALG00000034265
ENSGALG00000016991
ENSGALG00000016991
ENSGALG00000016991
ENSGALG00000016991
ENSGALG00000016991
ENSGALG00000012312
ENSGALG00000016991
ENSGALG00000026846
ENSGALG00000008222
ENSGALG00000035015
ENSGALG00000029536
ENSGALG00000005902
ENSGALG00000010296
ENSGALG00000005902
ENSGALG00000010296
ENSGALG00000005902
ENSGALG00000005902
ENSGALG00000000542
ENSGALG00000001542
ENSGALG00000002094
ENSGALG00000002124
ENSGALG00000002856
ENSGALG00000004738
ENSGALG00000007677
ENSGALG00000012799
ENSGALG00000025809
ENSGALG00000036110
ENSGALG00000030410
ENSGALG00000002094
ENSGALG00000033718
ENSGALG00000032757
ENSGALG00000032783
ENSGALG00000006968
ENSGALG00000012561
ENSGALG00000012561
ENSGALG00000010526
ENSGALG00000027860
ENSGALG00000037052
ENSGALG00000043451
ENSGALG00000033017
ENSGALG00000010526
ENSGALG00000016027
ENSGALG00000010526
ENSGALG00000010526
ENSGALG00000003604
ENSGALG00000007341
ENSGALG00000013189
ENSGALG00000040041
ENSGALG00000037077
ENSGALG00000039590
ENSGALG00000032660
ENSGALG00000040606
ENSGALG00000010459
ENSGALG00000006229
ENSGALG00000039606
ENSGALG00000039606
ENSGALG00000000122
ENSGALG00000000336
ENSGALG00000001036
ENSGALG00000001375
ENSGALG00000001462
ENSGALG00000002053
ENSGALG00000002548
ENSGALG00000003261
ENSGALG00000003651
ENSGALG00000003766
ENSGALG00000004306
ENSGALG00000004376
ENSGALG00000004534
ENSGALG00000005767
ENSGALG00000006273
ENSGALG00000006688
ENSGALG00000007623
ENSGALG00000009709
ENSGALG00000010507
ENSGALG00000010924
ENSGALG00000011347
ENSGALG00000012290
ENSGALG00000013740
ENSGALG00000013743
ENSGALG00000013882
ENSGALG00000014555
ENSGALG00000028543
ENSGALG00000017627
ENSGALG00000013431
ENSGALG00000007470
ENSGALG00000007362
ENSGALG00000024051
ENSGALG00000001076
ENSGALG00000000452
ENSGALG00000028871
ENSGALG00000029024
ENSGALG00000027838
ENSGALG00000027700
ENSGALG00000028119
ENSGALG00000027281
ENSGALG00000001462
ENSGALG00000026431
ENSGALG00000036602
ENSGALG00000010507
ENSGALG00000001557
ENSGALG00000034831
ENSGALG00000030466
ENSGALG00000040048
ENSGALG00000040068
ENSGALG00000038529
ENSGALG00000037744
ENSGALG00000032336
ENSGALG00000041152
ENSGALG00000031735
ENSGALG00000042171
ENSGALG00000003948
ENSGALG00000007711
ENSGALG00000042693
ENSGALG00000029768
ENSGALG00000033811
ENSGALG00000031660
ENSGALG00000006688
ENSGALG00000042171
ENSGALG00000029917
ENSGALG00000033888
ENSGALG00000030932
ENSGALG00000041418
ENSGALG00000041419
ENSGALG00000001036
ENSGALG00000032916
ENSGALG00000036036
ENSGALG00000032876
ENSGALG00000033790
ENSGALG00000042171
ENSGALG00000033885
ENSGALG00000037512
ENSGALG00000029530
ENSGALG00000008169
ENSGALG00000042628
ENSGALG00000041418
ENSGALG00000040068
ENSGALG00000031475
ENSGALG00000007659
ENSGALG00000007659
ENSGALG00000037352
ENSGALG00000033090
ENSGALG00000032916
ENSGALG00000033885
ENSGALG00000003261
ENSGALG00000029917
ENSGALG00000040685
ENSGALG00000033162
ENSGALG00000029369
ENSGALG00000038299
ENSGALG00000029612
ENSGALG00000010226
ENSGALG00000037744
ENSGALG00000030194
ENSGALG00000042029
ENSGALG00000042635
ENSGALG00000037797
ENSGALG00000033885
ENSGALG00000041556
ENSGALG00000027501
ENSGALG00000039108
ENSGALG00000035795
ENSGALG00000037211
ENSGALG00000030376
ENSGALG00000032335
ENSGALG00000035748
ENSGALG00000034831
ENSGALG00000035386
ENSGALG00000032051
ENSGALG00000035156
ENSGALG00000029401
ENSGALG00000038529
ENSGALG00000027700
ENSGALG00000030376
ENSGALG00000032199
ENSGALG00000029917
ENSGALG00000033090
ENSGALG00000029448
ENSGALG00000000329
ENSGALG00000033811
ENSGALG00000024172
ENSGALG00000000329
ENSGALG00000033162
ENSGALG00000036484
ENSGALG00000001768
ENSGALG00000029530
ENSGALG00000034831
ENSGALG00000008341
ENSGALG00000030124
ENSGALG00000029917
ENSGALG00000030932
ENSGALG00000001731
ENSGALG00000031031
ENSGALG00000033854
ENSGALG00000002548
ENSGALG00000042418
ENSGALG00000030466
ENSGALG00000026055
ENSGALG00000033405
ENSGALG00000038400
ENSGALG00000037549
ENSGALG00000033790
ENSGALG00000037998
ENSGALG00000007623
ENSGALG00000000329
ENSGALG00000032220
ENSGALG00000042628
ENSGALG00000004154
ENSGALG00000029530
ENSGALG00000040220
ENSGALG00000007623
ENSGALG00000040348
ENSGALG00000041419
ENSGALG00000029530
ENSGALG00000037995
ENSGALG00000029850
ENSGALG00000037576
ENSGALG00000014555
ENSGALG00000009725
ENSGALG00000002651
ENSGALG00000005767
ENSGALG00000036172
ENSGALG00000029401
ENSGALG00000008267
ENSGALG00000040048
ENSGALG00000030194
ENSGALG00000045228
ENSGALG00000026055
ENSGALG00000029980
ENSGALG00000014555
ENSGALG00000014836
ENSGALG00000028749
ENSGALG00000002563
ENSGALG00000032051
ENSGALG00000029389
ENSGALG00000005767
ENSGALG00000032051
ENSGALG00000042984
ENSGALG00000003405
ENSGALG00000036043
ENSGALG00000008222
ENSGALG00000029536
ENSGALG00000002288
ENSGALG00000008731
ENSGALG00000029485
ENSGALG00000033898
ENSGALG00000033898
ENSGALG00000029485
ENSGALG00000030570
ENSGALG00000022976
ENSGALG00000002288
ENSGALG00000001714
ENSGALG00000021340
ENSGALG00000001381
ENSGALG00000028636
ENSGALG00000037688
ENSGALG00000001714
ENSGALG00000021340
ENSGALG00000021340
ENSGALG00000021340
ENSGALG00000037688
ENSGALG00000001381
ENSGALG00000021340
ENSGALG00000001096
ENSGALG00000026613
ENSGALG00000002453
ENSGALG00000040397
ENSGALG00000000564
ENSGALG00000037401
ENSGALG00000043506
ENSGALG00000000811
ENSGALG00000000908
ENSGALG00000001470
ENSGALG00000001823
ENSGALG00000002849
ENSGALG00000003123
ENSGALG00000003597
ENSGALG00000004163
ENSGALG00000004583
ENSGALG00000004999
ENSGALG00000005964
ENSGALG00000006791
ENSGALG00000006842
ENSGALG00000007247
ENSGALG00000007416
ENSGALG00000007882
ENSGALG00000008394
ENSGALG00000008409
ENSGALG00000008666
ENSGALG00000010700
ENSGALG00000015013
ENSGALG00000015474
ENSGALG00000016508
ENSGALG00000027369
ENSGALG00000028759
ENSGALG00000029072
ENSGALG00000028958
ENSGALG00000031525
ENSGALG00000019741
ENSGALG00000010238
ENSGALG00000034358
ENSGALG00000040041
ENSGALG00000027369
ENSGALG00000004999
ENSGALG00000030242
ENSGALG00000041654
ENSGALG00000037714
ENSGALG00000036257
ENSGALG00000033705
ENSGALG00000031525
ENSGALG00000030857
ENSGALG00000033120
ENSGALG00000031525
ENSGALG00000015013
ENSGALG00000042333
ENSGALG00000037394
ENSGALG00000032530
ENSGALG00000026822
ENSGALG00000016446
ENSGALG00000031937
ENSGALG00000022920
ENSGALG00000001823
ENSGALG00000001731
ENSGALG00000036572
ENSGALG00000037849
ENSGALG00000004583
ENSGALG00000013100
ENSGALG00000038338
ENSGALG00000030002
ENSGALG00000041654
ENSGALG00000043084
ENSGALG00000003851
ENSGALG00000041654
ENSGALG00000001798
ENSGALG00000015399
ENSGALG00000008534
ENSGALG00000010324
ENSGALG00000044383
ENSGALG00000001823
ENSGALG00000028958
ENSGALG00000000811
ENSGALG00000004999
ENSGALG00000026491
ENSGALG00000008236
ENSGALG00000039384
ENSGALG00000039783
ENSGALG00000001798
ENSGALG00000002836
ENSGALG00000039783
ENSGALG00000040380
ENSGALG00000008539
ENSGALG00000010929
ENSGALG00000016508
ENSGALG00000000978
ENSGALG00000007477
ENSGALG00000042232
ENSGALG00000036963
ENSGALG00000005948
ENSGALG00000005074
ENSGALG00000033898
ENSGALG00000033898
ENSGALG00000015720
ENSGALG00000015800
ENSGALG00000004676
ENSGALG00000006411
ENSGALG00000008975
ENSGALG00000009257
ENSGALG00000009581
ENSGALG00000010419
ENSGALG00000001593
ENSGALG00000025904
ENSGALG00000027173
ENSGALG00000025959
ENSGALG00000032843
ENSGALG00000028940
ENSGALG00000043276
ENSGALG00000003130
ENSGALG00000043394
ENSGALG00000033163
ENSGALG00000029485
ENSGALG00000042572
ENSGALG00000030546
ENSGALG00000038400
ENSGALG00000034132
ENSGALG00000043394
ENSGALG00000025904
ENSGALG00000004676
ENSGALG00000001593
ENSGALG00000008176
ENSGALG00000028227
ENSGALG00000028227
ENSGALG00000032843
ENSGALG00000012429
ENSGALG00000026293
ENSGALG00000015021
ENSGALG00000022733
ENSGALG00000016241
ENSGALG00000008124
ENSGALG00000017049

## Sheet: DE mRNAs
gene_id
ENSGALG00000000362
ENSGALG00000000919
ENSGALG00000001429
ENSGALG00000002170
ENSGALG00000002232
ENSGALG00000002375
ENSGALG00000002467
ENSGALG00000002496
ENSGALG00000002503
ENSGALG00000002529
ENSGALG00000002759
ENSGALG00000003085
ENSGALG00000003120
ENSGALG00000003693
ENSGALG00000005065
ENSGALG00000005321
ENSGALG00000023925
ENSGALG00000005476
ENSGALG00000005714
ENSGALG00000021139
ENSGALG00000025778
ENSGALG00000027716
ENSGALG00000006378
ENSGALG00000006469
ENSGALG00000006473
ENSGALG00000006526
ENSGALG00000006657
ENSGALG00000006753
ENSGALG00000006797
ENSGALG00000006818
ENSGALG00000006834
ENSGALG00000007057
ENSGALG00000007171
ENSGALG00000007262
ENSGALG00000007288
ENSGALG00000007447
ENSGALG00000007537
ENSGALG00000007658
ENSGALG00000007862
ENSGALG00000008085
ENSGALG00000008087
ENSGALG00000008095
ENSGALG00000008429
ENSGALG00000008584
ENSGALG00000008701
ENSGALG00000009020
ENSGALG00000009064
ENSGALG00000009470
ENSGALG00000009479
ENSGALG00000009639
ENSGALG00000009700
ENSGALG00000010924
ENSGALG00000011395
ENSGALG00000011457
ENSGALG00000011551
ENSGALG00000011811
ENSGALG00000011813
ENSGALG00000011823
ENSGALG00000011967
ENSGALG00000012355
ENSGALG00000012466
ENSGALG00000012784
ENSGALG00000012787
ENSGALG00000012798
ENSGALG00000019553
ENSGALG00000013057
ENSGALG00000013112
ENSGALG00000013253
ENSGALG00000013569
ENSGALG00000013575
ENSGALG00000013605
ENSGALG00000024272
ENSGALG00000014453
ENSGALG00000014567
ENSGALG00000014801
ENSGALG00000014869
ENSGALG00000014935
ENSGALG00000015140
ENSGALG00000015624
ENSGALG00000015662
ENSGALG00000015666
ENSGALG00000015712
ENSGALG00000000814
ENSGALG00000016105
ENSGALG00000016142
ENSGALG00000016400
ENSGALG00000016668
ENSGALG00000016991
ENSGALG00000017173
ENSGALG00000017330
ENSGALG00000017334
ENSGALG00000017343
ENSGALG00000013723
ENSGALG00000019147
ENSGALG00000019489
ENSGALG00000019696
ENSGALG00000016669
ENSGALG00000016668
ENSGALG00000005338
ENSGALG00000001163
ENSGALG00000022815
ENSGALG00000015970
ENSGALG00000015691
ENSGALG00000011468
ENSGALG00000009913
ENSGALG00000005243
ENSGALG00000003569
ENSGALG00000027064
ENSGALG00000027594
ENSGALG00000004004
ENSGALG00000028982
ENSGALG00000028683
ENSGALG00000027704
ENSGALG00000028302
ENSGALG00000025881
ENSGALG00000027315
ENSGALG00000001153
ENSGALG00000035715
ENSGALG00000029941
ENSGALG00000027113
ENSGALG00000027630
ENSGALG00000002974
ENSGALG00000011086
ENSGALG00000032645
ENSGALG00000030344
ENSGALG00000029500
ENSGALG00000038140
ENSGALG00000037015
ENSGALG00000034144
ENSGALG00000038512
ENSGALG00000014786
ENSGALG00000038540
ENSGALG00000038461
ENSGALG00000005065
ENSGALG00000017040
ENSGALG00000035850
ENSGALG00000035559
ENSGALG00000030436
ENSGALG00000004796
ENSGALG00000002377
ENSGALG00000026019
ENSGALG00000034109
ENSGALG00000040770
ENSGALG00000003693
ENSGALG00000002557
ENSGALG00000031776
ENSGALG00000043684
ENSGALG00000039815
ENSGALG00000035879
ENSGALG00000005660
ENSGALG00000029102
ENSGALG00000033677
ENSGALG00000009297
ENSGALG00000036172
ENSGALG00000016058
ENSGALG00000011744
ENSGALG00000009995
ENSGALG00000015531
ENSGALG00000040303
ENSGALG00000040521
ENSGALG00000013776
ENSGALG00000042884
ENSGALG00000006096
ENSGALG00000032079
ENSGALG00000016920
ENSGALG00000032142
ENSGALG00000035774
ENSGALG00000007098
ENSGALG00000016261
ENSGALG00000028849
ENSGALG00000032456
ENSGALG00000004659
ENSGALG00000010005
ENSGALG00000035351
ENSGALG00000034725
ENSGALG00000040480
ENSGALG00000006802
ENSGALG00000010879
ENSGALG00000031193
ENSGALG00000007712
ENSGALG00000014513
ENSGALG00000010158
ENSGALG00000017271
ENSGALG00000034436
ENSGALG00000035244
ENSGALG00000032742
ENSGALG00000005716
ENSGALG00000006802
ENSGALG00000009645
ENSGALG00000037077
ENSGALG00000029446
ENSGALG00000008734
ENSGALG00000008974
ENSGALG00000031895
ENSGALG00000003466
ENSGALG00000016731
ENSGALG00000013124
ENSGALG00000031571
ENSGALG00000037863
ENSGALG00000030736
ENSGALG00000041630
ENSGALG00000037632
ENSGALG00000008609
ENSGALG00000002863
ENSGALG00000033678
ENSGALG00000038041
ENSGALG00000039238
ENSGALG00000010175
ENSGALG00000030027
ENSGALG00000010620
ENSGALG00000038255
ENSGALG00000013846
ENSGALG00000037332
ENSGALG00000014869
ENSGALG00000001042
ENSGALG00000042482
ENSGALG00000039120
ENSGALG00000028691
ENSGALG00000016575
ENSGALG00000037387
ENSGALG00000041300
ENSGALG00000041790
ENSGALG00000037943
ENSGALG00000003052
ENSGALG00000005180
ENSGALG00000041493
ENSGALG00000031120
ENSGALG00000043062
ENSGALG00000038589
ENSGALG00000032701
ENSGALG00000037172
ENSGALG00000036085
ENSGALG00000003693
ENSGALG00000003693
ENSGALG00000016456
ENSGALG00000007762
ENSGALG00000038343
ENSGALG00000043795
ENSGALG00000015746
ENSGALG00000007185
ENSGALG00000039193
ENSGALG00000011086
ENSGALG00000043793
ENSGALG00000032313
ENSGALG00000010230
ENSGALG00000001907
ENSGALG00000031895
ENSGALG00000038740
ENSGALG00000007125
ENSGALG00000029896
ENSGALG00000039815
ENSGALG00000007658
ENSGALG00000004798
ENSGALG00000029588
ENSGALG00000030613
ENSGALG00000032534
ENSGALG00000010371
ENSGALG00000017229
ENSGALG00000012311
ENSGALG00000010053
ENSGALG00000030712
ENSGALG00000031702
ENSGALG00000037283
ENSGALG00000001328
ENSGALG00000005922
ENSGALG00000043064
ENSGALG00000009932
ENSGALG00000030027
ENSGALG00000038022
ENSGALG00000010190
ENSGALG00000042999
ENSGALG00000033658
ENSGALG00000035267
ENSGALG00000033618
ENSGALG00000016766
ENSGALG00000040308
ENSGALG00000003693
ENSGALG00000041253
ENSGALG00000030904
ENSGALG00000002739
ENSGALG00000004048
ENSGALG00000005425
ENSGALG00000029621
ENSGALG00000038589
ENSGALG00000008684
ENSGALG00000030832
ENSGALG00000006284
ENSGALG00000042285
ENSGALG00000039406
ENSGALG00000037088
ENSGALG00000035717
ENSGALG00000033718
ENSGALG00000042148
ENSGALG00000041253
ENSGALG00000042538
ENSGALG00000034725
ENSGALG00000031301
ENSGALG00000033270
ENSGALG00000034834
ENSGALG00000007712
ENSGALG00000042217
ENSGALG00000042461
ENSGALG00000005295
ENSGALG00000015014
ENSGALG00000009369
ENSGALG00000016708
ENSGALG00000037455
ENSGALG00000008546
ENSGALG00000013768
ENSGALG00000002548
ENSGALG00000020921
ENSGALG00000037645
ENSGALG00000037675
ENSGALG00000042794
ENSGALG00000006503
ENSGALG00000037675
ENSGALG00000029408
ENSGALG00000041814
ENSGALG00000010035
ENSGALG00000040308
ENSGALG00000003359
ENSGALG00000009264
ENSGALG00000017329
ENSGALG00000036932
ENSGALG00000035351
ENSGALG00000012109
ENSGALG00000034821
ENSGALG00000043006
ENSGALG00000043139
ENSGALG00000031978
ENSGALG00000039520
ENSGALG00000005065
ENSGALG00000042400
ENSGALG00000004645
ENSGALG00000001901
ENSGALG00000014769
ENSGALG00000041643
ENSGALG00000042628
ENSGALG00000012172
ENSGALG00000021972
ENSGALG00000023670
ENSGALG00000008808
ENSGALG00000032796
ENSGALG00000041630
ENSGALG00000006855
ENSGALG00000043415
ENSGALG00000004804
ENSGALG00000001333
ENSGALG00000007098
ENSGALG00000036496
ENSGALG00000028749
ENSGALG00000032420
ENSGALG00000046107
ENSGALG00000043872
ENSGALG00000006771
ENSGALG00000045511
ENSGALG00000042939
ENSGALG00000012311
ENSGALG00000008590
ENSGALG00000002705
ENSGALG00000010244
ENSGALG00000044876
ENSGALG00000000474
ENSGALG00000030070
ENSGALG00000044669
ENSGALG00000005694
ENSGALG00000010565
ENSGALG00000008506
ENSGALG00000039387
ENSGALG00000012355
ENSGALG00000010517
ENSGALG00000045085
ENSGALG00000040373
ENSGALG00000007438
ENSGALG00000024481
ENSGALG00000045275
ENSGALG00000006300
ENSGALG00000046382
ENSGALG00000046141
ENSGALG00000016067
ENSGALG00000004003
ENSGALG00000000055
ENSGALG00000041200
ENSGALG00000037863
ENSGALG00000006323
ENSGALG00000015917
ENSGALG00000044822
ENSGALG00000016563
ENSGALG00000008931
ENSGALG00000005694
ENSGALG00000017330
ENSGALG00000029480
ENSGALG00000039011
ENSGALG00000044239
ENSGALG00000034821
ENSGALG00000044135
ENSGALG00000045875
ENSGALG00000015713
ENSGALG00000012296
ENSGALG00000045522
ENSGALG00000004509
ENSGALG00000044227
ENSGALG00000009621
ENSGALG00000035717
ENSGALG00000038747
ENSGALG00000006657
ENSGALG00000000474
ENSGALG00000006657
ENSGALG00000030964
ENSGALG00000015328
ENSGALG00000046258
ENSGALG00000030269
ENSGALG00000008684
ENSGALG00000044359
ENSGALG00000042984
ENSGALG00000004161
ENSGALG00000041013
ENSGALG00000003521
ENSGALG00000017330
ENSGALG00000012109
