# Supplementary material for: Identification of key miRNAs affecting broilers with valgus–varus deformity by RNA sequencing and analysis of miRNA–mRNA interactions
Source: Royal Society of Chemistry journal article supplement (doi:10.1039/d1mo00011j), 2021-06-07
Supplement: d1mo00011j5.xlsx [file d1mo00011j5.xlsx]

## Sheet: Sheet1
Sample Name	Gene Name	Cq Mean	Cq Error	Sample Name	Gene Name	Cq Mean	Cq Error	∆ct1	∆ct1-mean value of Group J of U6	∆∆ct	p value
J1	29a-3p	18.64	0.11	J1	U6	9.63	0.06	9.01	-0.106667	1.07674	0.00560327
J1	29a-3p	18.64	0.11	J1	U6	9.63	0.06	9.01	-0.106667	1.07674
J1	29a-3p	18.64	0.11	J1	U6	9.63	0.06	9.01	-0.106667	1.07674
J2	29a-3p	19.17	0.11	J2	U6	9.57	0.09	9.6	0.483333	0.715323
J2	29a-3p	19.17	0.11	J2	U6	9.57	0.09	9.6	0.483333	0.715323
J2	29a-3p	19.17	0.11	J2	U6	9.57	0.09	9.6	0.483333	0.715323
J3	29a-3p	18.43	0.05	J3	U6	9.69	0.07	8.74	-0.376667	1.29834
J3	29a-3p	18.43	0.05	J3	U6	9.69	0.07	8.74	-0.376667	1.29834
J3	29a-3p	18.43	0.05	J3	U6	9.69	0.07	8.74	-0.376667	1.29834
B1	29a-3p	17.98	0.01	B1	U6	9.46	0.08	8.52	-0.596667	1.51222
B1	29a-3p	17.98	0.01	B1	U6	9.46	0.08	8.52	-0.596667	1.51222
B1	29a-3p	17.98	0.01	B1	U6	9.46	0.08	8.52	-0.596667	1.51222
B2	29a-3p	18.08	0.08	B2	U6	9.33	0.27	8.75	-0.366667	1.28937
B2	29a-3p	18.08	0.08	B2	U6	9.33	0.27	8.75	-0.366667	1.28937
B2	29a-3p	18.08	0.08	B2	U6	9.33	0.27	8.75	-0.366667	1.28937
B3	29a-3p	18.22	0.07	B3	U6	9.38	0.15	8.84	-0.276667	1.21139
B3	29a-3p	18.22	0.07	B3	U6	9.38	0.15	8.84	-0.276667	1.21139
B3	29a-3p	18.22	0.07	B3	U6	9.38	0.15	8.84	-0.276667	1.21139
J1	460a-5p	26.49	0.18	J1	U6	9.63	0.06	16.86	7.74333	0.00466686	0.00317037
J1	460a-5p	26.49	0.18	J1	U6	9.63	0.06	16.86	7.74333	0.00466686
J1	460a-5p	26.49	0.18	J1	U6	9.63	0.06	16.86	7.74333	0.00466686
J2	460a-5p	26.59	0.22	J2	U6	9.57	0.09	17.02	7.90333	0.00417695
J2	460a-5p	26.59	0.22	J2	U6	9.57	0.09	17.02	7.90333	0.00417695
J2	460a-5p	26.59	0.22	J2	U6	9.57	0.09	17.02	7.90333	0.00417695
J3	460a-5p	28.94	0.1	J3	U6	9.69	0.07	19.25	10.1333	0.000890354
J3	460a-5p	28.94	0.1	J3	U6	9.69	0.07	19.25	10.1333	0.000890354
J3	460a-5p	28.94	0.1	J3	U6	9.69	0.07	19.25	10.1333	0.000890354
B1	460a-5p	23.05	0.1	B1	U6	9.46	0.08	13.59	4.47333	0.0450187
B1	460a-5p	23.05	0.1	B1	U6	9.46	0.08	13.59	4.47333	0.0450187
B1	460a-5p	23.05	0.1	B1	U6	9.46	0.08	13.59	4.47333	0.0450187
B2	460a-5p	24.98	0.32	B2	U6	9.33	0.27	15.65	6.53333	0.0107962
B2	460a-5p	24.98	0.32	B2	U6	9.33	0.27	15.65	6.53333	0.0107962
B2	460a-5p	24.98	0.32	B2	U6	9.33	0.27	15.65	6.53333	0.0107962
B3	460a-5p	24.84	0.3	B3	U6	9.38	0.15	15.46	6.34333	0.0123159
B3	460a-5p	24.84	0.3	B3	U6	9.38	0.15	15.46	6.34333	0.0123159
B3	460a-5p	24.84	0.3	B3	U6	9.38	0.15	15.46	6.34333	0.0123159
J1	222b-3p	22.06	0.05	J1	U6	9.63	0.06	12.43	3.31333	0.100598	0.00496708
J1	222b-3p	22.06	0.05	J1	U6	9.63	0.06	12.43	3.31333	0.100598
J1	222b-3p	22.06	0.05	J1	U6	9.63	0.06	12.43	3.31333	0.100598
J2	222b-3p	22.44	0.2	J2	U6	9.57	0.09	12.87	3.75333	0.0741539
J2	222b-3p	22.44	0.2	J2	U6	9.57	0.09	12.87	3.75333	0.0741539
J2	222b-3p	22.44	0.2	J2	U6	9.57	0.09	12.87	3.75333	0.0741539
J3	222b-3p	25	0.14	J3	U6	9.69	0.07	15.31	6.19333	0.0136654
J3	222b-3p	25	0.14	J3	U6	9.69	0.07	15.31	6.19333	0.0136654
J3	222b-3p	25	0.14	J3	U6	9.69	0.07	15.31	6.19333	0.0136654
B1	222b-3p	24.05	0.14	B1	U6	9.46	0.08	14.59	5.47333	0.0225093
B1	222b-3p	24.05	0.14	B1	U6	9.46	0.08	14.59	5.47333	0.0225093
B1	222b-3p	24.05	0.14	B1	U6	9.46	0.08	14.59	5.47333	0.0225093
B2	222b-3p	23.85	0.21	B2	U6	9.33	0.27	14.52	5.40333	0.0236284
B2	222b-3p	23.85	0.21	B2	U6	9.33	0.27	14.52	5.40333	0.0236284
B2	222b-3p	23.85	0.21	B2	U6	9.33	0.27	14.52	5.40333	0.0236284
B3	222b-3p	24.45	0.41	B3	U6	9.38	0.15	15.07	5.95333	0.0161387
B3	222b-3p	24.45	0.41	B3	U6	9.38	0.15	15.07	5.95333	0.0161387
B3	222b-3p	24.45	0.41	B3	U6	9.38	0.15	15.07	5.95333	0.0161387
J1	454-3P	30.53	0.14	J1	U6	9.63	0.06	20.9	11.7833	0.000283703	0.0373039
J1	454-3P	30.53	0.14	J1	U6	9.63	0.06	20.9	11.7833	0.000283703
J1	454-3P	30.53	0.14	J1	U6	9.63	0.06	20.9	11.7833	0.000283703
J2	454-3P	30.2	0.14	J2	U6	9.57	0.09	20.63	11.5133	0.000342091
J2	454-3P	30.2	0.14	J2	U6	9.57	0.09	20.63	11.5133	0.000342091
J2	454-3P	30.2	0.14	J2	U6	9.57	0.09	20.63	11.5133	0.000342091
J3	454-3P	29.8	0.46	J3	U6	9.69	0.07	20.11	10.9933	0.000490543
J3	454-3P	29.8	0.46	J3	U6	9.69	0.07	20.11	10.9933	0.000490543
J3	454-3P	29.8	0.46	J3	U6	9.69	0.07	20.11	10.9933	0.000490543
B1	454-3P	28.94	0.14	B1	U6	9.46	0.08	19.48	10.3633	0.000759147
B1	454-3P	28.94	0.14	B1	U6	9.46	0.08	19.48	10.3633	0.000759147
B1	454-3P	28.94	0.14	B1	U6	9.46	0.08	19.48	10.3633	0.000759147
B2	454-3P	29.61	0.12	B2	U6	9.33	0.27	20.28	11.1633	0.000436015
B2	454-3P	29.61	0.12	B2	U6	9.33	0.27	20.28	11.1633	0.000436015
B2	454-3P	29.61	0.12	B2	U6	9.33	0.27	20.28	11.1633	0.000436015
B3	454-3P	29.87	0.72	B3	U6	9.38	0.15	20.49	11.3733	0.000376952
B3	454-3P	29.87	0.72	B3	U6	9.38	0.15	20.49	11.3733	0.000376952
B3	454-3P	29.87	0.72	B3	U6	9.38	0.15	20.49	11.3733	0.000376952
B1	18a-5p	29.26	0.32	U6	17.97	0.28	11.29	-6.45333	87.6286	0.000959866
B1	18a-5p	29.26	0.32	U6	17.97	0.28	11.29	-6.45333	87.6286
B1	18a-5p	29.26	0.32	U6	17.97	0.28	11.29	-6.45333	87.6286
B2	18a-5p	28.77	0.23	U6	18.34	0.17	10.43	-7.31333	159.049
B2	18a-5p	28.77	0.23	U6	18.34	0.17	10.43	-7.31333	159.049
B2	18a-5p	28.77	0.23	U6	18.34	0.17	10.43	-7.31333	159.049
B3	18a-5p	29	0.2	U6	17.53	0.24	11.47	-6.27333	77.35
B3	18a-5p	29	0.2	U6	17.53	0.24	11.47	-6.27333	77.35
B3	18a-5p	29	0.2	U6	17.53	0.24	11.47	-6.27333	77.35
J1	18a-5p	29.69	0.59	U6	17.88	0.29	11.81	-5.93333	61.1097
J1	18a-5p	29.69	0.59	U6	17.88	0.29	11.81	-5.93333	61.1097
J1	18a-5p	29.69	0.59	U6	17.88	0.29	11.81	-5.93333	61.1097
J2	18a-5p	30.58	0.02	U6	17.48	0.09	13.1	-4.64333	24.9909
J2	18a-5p	30.58	0.02	U6	17.48	0.09	13.1	-4.64333	24.9909
J2	18a-5p	30.58	0.02	U6	17.48	0.09	13.1	-4.64333	24.9909
J3	18a-5p	29.6	0.02	U6	17.87	0.34	11.73	-6.01333	64.5941
J3	18a-5p	29.6	0.02	U6	17.87	0.34	11.73	-6.01333	64.5941
J3	18a-5p	29.6	0.02	U6	17.87	0.34	11.73	-6.01333	64.5941
B1	16-5P	21.6	0.1	U6	17.97	0.28	3.63	-14.1133	17722.9	0.001297
B1	16-5P	21.6	0.1	U6	17.97	0.28	3.63	-14.1133	17722.9
B1	16-5P	21.6	0.1		17.97	0.28	3.63	-14.1133	17722.9
B2	16-5P	21.86	0.13	U6	18.34	0.17	3.52	-14.2233	19127.1
B2	16-5P	21.86	0.13	U6	18.34	0.17	3.52	-14.2233	19127.1
B2	16-5P	21.86	0.13	U6	18.34	0.17	3.52	-14.2233	19127.1
B3	16-5P	21.76	0.08	U6	17.53	0.24	4.23	-13.5133	11692.8
B3	16-5P	21.76	0.08	U6	17.53	0.24	4.23	-13.5133	11692.8
B3	16-5P	21.76	0.08	U6	17.53	0.24	4.23	-13.5133	11692.8
J1	16-5P	21.86	0.32	U6	17.88	0.29	3.98	-13.7633	13905.1
J1	16-5P	21.86	0.32	U6	17.88	0.29	3.98	-13.7633	13905.1
J1	16-5P	21.86	0.32	U6	17.88	0.29	3.98	-13.7633	13905.1
J2	16-5P	22.27	0.25	U6	17.48	0.09	4.79	-12.9533	7931.24
J2	16-5P	22.27	0.25	U6	17.48	0.09	4.79	-12.9533	7931.24
J2	16-5P	22.27	0.25	U6	17.48	0.09	4.79	-12.9533	7931.24
J3	16-5P	22.34	0.17	U6	17.87	0.34	4.47	-13.2733	9900.8
J3	16-5P	22.34	0.17	U6	17.87	0.34	4.47	-13.2733	9900.8
J3	16-5P	22.34	0.17	U6	17.87	0.34	4.47	-13.2733	9900.8
